# Supplementary material for: Lipidomic Assessment of the Inhibitory Effect of Standardized Water Extract of Hydrangea serrata (Thunb.) Ser. Leaves during Adipogenesis
Source: Nutrients. 2024 May 16;16(10):1508. doi: 10.3390/nu16101508 (PMC11124303; doi:10.3390/nu16101508)
Supplement: Supplementary file 1 [file nutrients-16-01508-s001.zip › supplementary tables.xlsx]

## Sheet: Table S1
Table S1. Identified lipids in LC-MS-based lipidomics results. A total of 619 lipid species from 18 classes were detected in the positive and negative ion modes
Class	Subclass	Total identified lipid species
Glycerolipids (GL)	Triacylglycerol (TG)	151
	Alkyltriacylglycerol (TG-O)	24
	Diacylglycerol (DG)	16
Glycerophospholipids (GP)	Phosphatidylglycerol (PG)	29
	Phosphatidic acid (PA)	3
	Phosphatidylcholine (PC)	68
	Alkylphosphatidylcholine (PC-O)	53
	Phosphatidylethanolamine (PE)	51
	Alkylphosphatidylethanolamine (PE-O)	53
	Phosphatidylinositol (PI)	21
	Phosphatidylserine (PS)	11
	Lysophosphatidylcholine (LPC)	22
	Alkyllysophosphatidylcholine (LPC-O)	6
	Lysophosphatidylethanolamine (LPE)	19
	Alkyllysophosphatidylethanolamine (LPE-O)	7
Sphingolipids (SL)	Ceramide (CER)	24
	Hexosylceramide (HexCER)	20
	Sphingomyelin (SM)	41

## Sheet: Table S2
Table S2. Potential lipid biomarker in 3T3L1 cells shown statistically significant difference among sampling groups.
Class	Subclass	Metabolite	Relative intensity (normalized by IS)						p-value
			GM	DM	WHS treatment (μg/mL)				GM vs DM	DM vs WHS (μg/mL)
					50	100	200			50	100	200
GL	DG	DG 16:0_16:0	0.017±0.328	6.925±156.949	3.226±79.889	1.436±38.253	0.104±1.01		<0.01**	0.0952381	<0.05*	<0.01**
GL	DG	DG 16:0_16:1	0.008±0.17	32.484±736.374	13.920±382.951	5.771±209.3	0.102±1.393		<0.01**	0.0952381	<0.05*	<0.01**
GL	DG	DG 16:0_17:1	0.004±0.042	16.696±379.085	5.865±170.309	2.280±81.341	0.034±0.819		<0.01**	0.0952381	<0.05*	<0.01**
GL	DG	DG 16:0_18:1	0.092±0.73	21.371±490.446	11.635±277.804	5.885±86.023	0.586±6.641		<0.01**	0.547619	0.150794	<0.01**
GL	DG	DG 16:0_33:0	0.006±0.019	45.157±987.068	12.850±385.561	5.012±174.753	0.212±3.826		<0.01**	<0.05*	<0.01**	<0.01**
GL	DG	DG 16:1_16:1	0.007±0.025	8.249±208.951	4.504±128.795	1.958±53.194	0.015±0.055		<0.01**	0.690476	<0.05*	<0.01**
GL	DG	DG 16:1_18:1	0.116±1.427	23.317±541.239	11.719±332.493	5.515±131.302	0.222±1.341		<0.01**	0.420635	<0.05*	<0.01**
GL	DG	DG 18:0_22:5	0.025±0.219	0.232±6.061	0.258±6.142	0.287±6.211	0.219±3.94		0.0952381	0.0555556	0.0555556	<0.01**
GL	TG	TG 10:0_15:0_16:1	0.019±1.004	440.934±10168.106	187.127±4914.319	79.206±2573.543	1.381±17.944		<0.01**	0.0952381	<0.05*	<0.01**
GL	TG	TG 10:0_16:0_16:1	0.110±1.454	520.846±11506.222	234.487±6098.601	106.899±3063.142	4.115±51.528		<0.01**	0.0952381	<0.05*	<0.01**
GL	TG	TG 10:0_16:1_16:1	0.048±1.427	406.978±10281.508	193.993±5690.339	94.155±2490.798	1.960±38.603		<0.01**	0.150794	0.150794	<0.01**
GL	TG	TG 11:0_16:1_16:1	0.020±0.974	437.975±9895.582	163.177±4358.149	71.028±2206.443	1.047±13.365		<0.01**	0.0952381	<0.05*	<0.01**
GL	TG	TG 12:0_14:0_16:0	0.110±0.957	90.157±1824.782	43.793±1040.654	20.913±534.666	1.798±19.534		<0.01**	0.150794	<0.05*	<0.01**
GL	TG	TG 12:0_15:0_16:0	0.020±0.589	18.130±360.350	5.417±151.043	2.205±70.648	0.138±0.977		<0.01**	<0.01**	<0.01**	<0.01**
GL	TG	TG 12:0_15:0_16:1	0.071±1.416	549.484±12029.019	199.027±5248.836	87.901±2640.735	2.215±26.684		<0.01**	0.0555556	<0.05*	<0.01**
GL	TG	TG 13:0_15:0_16:0	0.005±0.162	20.296±407.429	5.897±154.237	2.552±82.484	0.131±3.105		<0.01**	<0.01**	<0.01**	<0.01**
GL	TG	TG 13:0_16:1_20:4	0.008±0.083	11.679±235.993	6.489±189.993	3.375±82.435	0.081±1.847		<0.01**	0.690476	0.150794	<0.01**
GL	TG	TG 13:1_14:1_16:1	0.006±0.014	80.398±1799.641	32.722±864.024	14.404±446.450	0.208±2.634		<0.01**	0.0952381	<0.05*	<0.01**
GL	TG	TG 13:1_18:0_19:0	0.014±0.830	13.231±270.062	5.440±139.285	2.357±79.938	0.059±1.020		<0.01**	<0.05*	<0.05*	<0.01**
GL	TG	TG 13:1_19:0_21:0	0.019±0.318	25.571±480.194	14.657±271.527	8.624±178.359	0.426±4.580		<0.01**	0.84127	0.0952381	<0.01**
GL	TG	TG 14:0_14:0_15:0	0.060±0.665	87.320±1659.236	37.495±885.425	16.478±381.564	1.084±11.440		<0.01**	<0.05*	<0.01**	<0.01**
GL	TG	TG 14:0_14:0_16:0	0.272±2.893	112.444±2122.073	51.072±1298.467	23.520±356.318	3.114±35.357		<0.01**	0.0555556	<0.01**	<0.01**
GL	TG	TG 14:0_14:1_16:0	0.313±3.604	783.550±16484.854	316.354±8180.554	142.371±4105.971	6.029±62.341		<0.01**	0.0555556	<0.05*	<0.01**
GL	TG	TG 14:0_14:1_16:1	0.170±2.817	912.308±19825.851	378.468±10381.138	171.064±4955.697	4.190±54.231		<0.01**	0.0952381	<0.05*	<0.01**
GL	TG	TG 14:0_15:0_16:0	0.217±5.621	156.339±2941.247	70.851±2020.799	30.036±378.098	2.825±28.666		<0.01**	0.150794	<0.01**	<0.01**
GL	TG	TG 14:0_15:0_16:1	0.229±5.270	1231.953±25035.787	498.717±12792.261	217.683±6603.163	4.754±47.901		<0.01**	<0.05*	<0.01**	<0.01**
GL	TG	TG 14:0_15:0_22:6	0.004±0.008	6.928±174.137	4.461±123.583	1.599±21.771	0.096±0.925		<0.01**	1	0.222222	<0.01**
GL	TG	TG 14:0_16:0_16:1	0.895±13.319	1783.594±35770.127	824.507±21523.050	382.610±10080.546	16.444±168.724		<0.01**	<0.05*	<0.05*	<0.01**
GL	TG	TG 14:0_16:1_20:4	0.112±1.982	31.429±682.132	16.457±351.283	12.662±162.647	0.722±7.864		<0.01**	0.150794	1	<0.01**
GL	TG	TG 14:0_16:1_20:5	0.037±0.858	11.535±346.613	6.529±236.017	4.576±125.150	0.123±1.614		<0.01**	1	0.690476	<0.01**
GL	TG	TG 14:0_16:1_22:6	0.019±0.628	15.220±363.675	10.241±176.425	7.341±61.123	0.415±4.089		<0.01**	0.222222	0.0952381	<0.01**
GL	TG	TG 14:1_14:1_16:1	0.046±0.745	236.972±5324.211	106.279±2819.397	46.781±1265.403	0.922±14.575		<0.01**	0.0952381	<0.05*	<0.01**
GL	TG	TG 14:1_15:0_16:1	0.009±0.250	17.030±315.235	8.676±202.116	4.867±68.841	0.209±2.699		<0.01**	<0.05*	<0.01**	<0.01**
GL	TG	TG 14:1_15:0_16:1	0.124±3.729	1318.056±28287.559	492.184±13400.321	215.083±6562.514	2.561±34.473		<0.01**	0.0555556	<0.05*	<0.01**
GL	TG	TG 14:1_15:1_16:1	0.017±0.796	337.552±7665.624	122.422±3637.358	51.099±1732.281	0.500±6.929		<0.01**	0.0952381	<0.05*	<0.01**
GL	TG	TG 14:1_16:1_16:1	0.195±3.777	1118.254±24277.963	541.230±15426.825	233.560±7247.518	2.945±40.520		<0.01**	0.0952381	<0.05*	<0.01**
GL	TG	TG 14:1_16:1_16:2	0.030±0.667	32.692±745.198	16.646±393.473	8.251±181.668	0.198±4.122		<0.01**	0.222222	0.150794	<0.01**
GL	TG	TG 14:1_16:1_18:2	0.151±2.548	114.340±2681.363	50.956±1073.493	27.352±839.788	0.764±15.388		<0.01**	0.150794	0.0555556	<0.01**
GL	TG	TG 15:0_15:0_16:0	0.762±19.695	248.451±4785.644	125.195±4009.444	43.052±581.095	8.805±86.747		<0.01**	0.547619	<0.01**	<0.01**
GL	TG	TG 15:0_16:0_16:0	0.634±29.502	363.160±7722.268	207.930±7571.760	55.246±1070.150	8.067±67.550		<0.01**	0.84127	<0.01**	<0.01**
GL	TG	TG 15:0_16:0_16:1	0.586±12.730	2452.584±49373.688	1254.617±31667.020	597.052±14932.435	14.834±143.463		<0.01**	0.150794	<0.05*	<0.01**
GL	TG	TG 15:0_16:0_18:1	0.660±8.068	2258.604±47178.794	1188.109±29554.116	591.695±15551.559	20.556±180.983		<0.01**	0.0952381	<0.05*	<0.01**
GL	TG	TG 15:0_16:0_20:4	0.020±0.306	14.455±330.035	8.132±182.631	4.718±85.453	0.209±1.540		<0.01**	0.547619	0.309524	<0.01**
GL	TG	TG 15:0_16:0_22:6	0.005±0.102	10.416±230.594	6.950±109.182	4.811±46.473	0.432±4.104		<0.01**	0.309524	0.0952381	<0.05*
GL	TG	TG 15:0_16:0_24:0	0.007±0.201	15.424±389.919	5.674±200.853	1.334±32.381	0.123±2.490		<0.01**	0.222222	<0.01**	<0.01**
GL	TG	TG 15:0_16:0_24:1	0.018±0.374	89.260±1978.381	40.828±1175.779	15.342±577.782	0.517±6.396		<0.01**	0.0952381	<0.05*	<0.01**
GL	TG	TG 15:0_16:1_16:1	0.435±16.395	2683.422±54907.124	1341.069±33467.849	632.475±16361.273	10.310±114.512		<0.01**	0.0952381	<0.05*	<0.01**
GL	TG	TG 15:0_16:1_18:3	0.011±0.132	10.540±271.796	6.712±213.165	3.218±14.443	0.180±3.084		<0.01**	1	0.547619	<0.01**
GL	TG	TG 15:0_16:1_20:4	0.041±1.038	28.744±610.580	15.591±291.810	9.317±168.588	0.325±4.844		<0.01**	0.547619	0.420635	<0.01**
GL	TG	TG 15:0_16:1_20:5	0.006±0.013	20.757±441.916	5.443±107.202	3.339±49.155	0.078±1.101		<0.01**	0.420635	0.84127	<0.01**
GL	TG	TG 15:0_16:1_22:5	0.035±1.215	20.757±441.916	13.603±279.665	8.523±116.566	0.211±3.742		<0.01**	0.309524	0.690476	<0.01**
GL	TG	TG 15:0_16:1_22:6	0.004±0.051	22.721±502.309	14.590±264.092	9.806±123.152	0.238±2.665		<0.01**	0.420635	0.547619	<0.01**
GL	TG	TG 15:0_18:1_24:0	0.009±0.135	80.916±1850.544	33.015±970.265	12.098±484.034	0.304±5.626		<0.01**	0.0952381	<0.05*	<0.01**
GL	TG	TG 15:0_18:1_30:1	0.005±0.008	2.874±67.394	1.017±27.924	0.338±18.033	0.010±0.030		<0.01**	0.0952381	<0.05*	<0.01**
GL	TG	TG 15:1_16:1_16:1	0.101±3.638	1193.524±26078.682	555.294±14930.774	241.293±7536.248	2.065±30.225		<0.01**	0.0952381	<0.05*	<0.01**
GL	TG	TG 15:1_16:1_16:2	0.008±0.017	33.791±808.491	15.509±499.948	7.099±201.328	0.177±3.408		<0.01**	0.222222	0.0555556	<0.01**
GL	TG	TG 15:1_16:1_18:2	0.054±1.201	76.743±1777.106	37.401±829.368	19.261±375.873	0.517±6.057		<0.01**	0.150794	0.150794	<0.01**
GL	TG	TG 15:1_16:1_20:4	0.005±0.024	10.649±419.989	3.627±79.850	1.707±42.875	0.054±1.211		<0.01**	0.420635	0.0555556	<0.01**
GL	TG	TG 15:1_16:1_22:6	0.004±0.010	3.420±82.127	2.242±44.314	1.672±23.424	0.007±0.022		<0.01**	0.547619	0.150794	<0.01**
GL	TG	TG 15:1_17:0_19:0	0.007±0.105	18.416±390.109	9.437±238.394	4.339±118.810	0.198±2.682		<0.01**	0.222222	<0.05*	<0.01**
GL	TG	TG 15:1_17:0_19:1	0.006±0.009	20.780±462.153	9.519±234.722	4.465±126.240	0.101±1.946		<0.01**	0.0952381	<0.05*	<0.01**
GL	TG	TG 16:0_16:0_16:1	1.925±20.327	2651.814±53648.681	1435.134±31352.434	768.533±18368.070	37.787±369.681		<0.01**	0.0952381	0.0555556	<0.01**
GL	TG	TG 16:0_16:0_17:0	0.341±14.008	456.460±9762.667	192.430±7134.094	44.965±1253.645	6.749±80.838		<0.01**	0.420635	<0.01**	<0.01**
GL	TG	TG 16:0_16:0_18:0	0.734±11.960	292.979±7450.210	147.865±5614.855	30.545±670.649	9.575±130.523		<0.01**	0.84127	<0.01**	<0.05*
GL	TG	TG 16:0_16:0_18:1	2.873±20.520	2040.939±42010.463	1197.231±27547.906	581.110±12431.279	39.546±280.927		<0.01**	0.690476	<0.05*	<0.01**
GL	TG	TG 16:0_16:0_24:0	0.017±0.296	23.455±627.783	10.393±399.960	1.849±37.162	0.354±7.397		<0.01**	0.547619	<0.01**	<0.01**
GL	TG	TG 16:0_16:0_26:0	0.005±0.101	12.572±338.687	5.723±231.257	0.813±21.972	0.144±3.933		<0.01**	0.547619	<0.01**	<0.01**
GL	TG	TG 16:0_16:1_16:1	1.602±31.518	2978.793±62067.085	1747.078±41360.464	926.117±17528.546	36.412±389.451		<0.01**	0.690476	0.150794	<0.01**
GL	TG	TG 16:0_16:1_17:1	0.627±14.287	1993.630±40593.755	1074.906±26053.895	567.028±11215.841	17.223±165.705		<0.01**	0.150794	<0.05*	<0.01**
GL	TG	TG 16:0_16:1_18:1	2.972±20.904	1854.796±37925.966	1053.839±23709.125	620.842±10587.275	42.097±416.939		<0.01**	0.309524	0.222222	<0.01**
GL	TG	TG 16:0_16:1_20:4	0.236±2.482	44.589±942.196	29.351±506.507	19.090±228.236	1.613±19.088		<0.01**	0.309524	0.547619	<0.05*
GL	TG	TG 16:0_16:1_24:0	0.073±0.565	144.435±3177.258	72.413±2015.755	28.187±1000.131	1.431±25.339		<0.01**	0.222222	<0.05*	<0.01**
GL	TG	TG 16:0_16:1_24:1	0.180±0.927	187.394±4315.564	91.531±2192.871	40.574±1436.712	2.454±36.144		<0.01**	0.0952381	<0.05*	<0.01**
GL	TG	TG 16:0_17:0_18:0	0.088±1.816	100.969±2276.535	47.426±1575.965	11.086±327.560	2.073±30.174		<0.01**	0.547619	<0.01**	<0.01**
GL	TG	TG 16:0_17:0_18:1	0.342±4.113	1109.962±23716.055	549.867±13779.799	268.832±8137.340	12.275±124.592		<0.01**	0.0952381	<0.05*	<0.01**
GL	TG	TG 16:0_17:0_24:0	0.005±0.017	11.562±286.564	4.588±166.668	0.854±22.501	0.085±1.627		<0.01**	0.420635	<0.01**	<0.01**
GL	TG	TG 16:0_17:1_18:1	0.584±5.504	1057.296±22658.764	569.129±13653.387	312.393±6270.681	14.931±137.847		<0.01**	0.222222	0.0952381	<0.01**
GL	TG	TG 16:0_17:1_20:4	0.072±2.289	17.219±363.713	11.272±214.847	7.090±93.685	0.627±6.261		<0.01**	0.309524	0.690476	<0.05*
GL	TG	TG 16:0_18:0_18:1	1.558±11.268	879.270±19970.084	487.638±11146.766	233.872±6542.917	19.993±267.071		<0.01**	0.420635	<0.05*	<0.01**
GL	TG	TG 16:0_18:0_19:0	0.012±0.498	21.185±514.575	9.617±366.693	2.397±60.379	0.362±5.642		<0.01**	0.690476	<0.01**	<0.01**
GL	TG	TG 16:0_18:0_20:0	0.044±0.489	23.476±557.111	10.672±396.019	2.472±49.097	0.627±13.430		<0.01**	0.420635	<0.01**	<0.05*
GL	TG	TG 16:0_18:1_18:1	4.062±18.878	1126.331±25152.756	650.693±14665.845	348.917±6507.966	35.122±280.568		<0.01**	0.309524	0.0952381	<0.01**
GL	TG	TG 16:0_18:1_22:5	1.577±11.713	8.405±153.130	7.595±126.007	6.795±23.840	3.085±47.864		<0.01**	<0.05*	<0.01**	<0.01**
GL	TG	TG 16:0_18:1_22:6	0.275±2.218	7.454±164.996	7.586±103.523	6.853±18.206	2.596±26.878		<0.01**	<0.01**	<0.01**	<0.01**
GL	TG	TG 16:0_18:1_24:0	0.036±0.262	115.659±2786.968	56.995±1554.240	21.234±776.231	0.893±18.196		<0.01**	0.309524	<0.05*	<0.01**
GL	TG	TG 16:0_18:1_24:1	0.101±0.673	159.382±3604.686	79.730±2213.922	32.637±1096.192	1.478±24.219		<0.01**	0.150794	<0.05*	<0.01**
GL	TG	TG 16:0_18:1_25:0	0.004±0.004	38.846±920.604	18.203±531.008	6.212±264.007	0.138±2.615		<0.01**	0.309524	<0.05*	<0.01**
GL	TG	TG 16:0_18:1_26:0	0.009±0.170	44.791±1006.794	23.229±610.667	8.428±345.968	0.283±3.489		<0.01**	0.309524	<0.05*	<0.01**
GL	TG	TG 16:0_18:1_26:1	0.042±0.286	73.256±1789.908	36.292±958.689	15.573±516.598	0.790±13.628		<0.01**	0.309524	<0.05*	<0.01**
GL	TG	TG 16:1_16:1_16:1	0.702±14.643	2334.626±49697.216	1399.590±33117.913	695.601±15944.998	12.559±166.063		<0.01**	1	0.0952381	<0.01**
GL	TG	TG 16:1_16:1_16:3	0.028±0.639	16.118±345.459	9.457±216.061	5.218±93.599	0.241±2.165		<0.01**	0.84127	0.222222	<0.01**
GL	TG	TG 16:1_16:1_17:1	0.260±5.888	1180.570±24743.763	682.511±17110.753	315.005±8024.637	5.585±64.126		<0.01**	0.84127	<0.05*	<0.01**
GL	TG	TG 16:1_16:1_18:1	1.456±12.964	1241.371±25602.678	730.944±17441.498	409.705±6739.893	18.936±199.572		<0.01**	0.84127	0.150794	<0.01**
GL	TG	TG 16:1_16:1_18:2	0.482±4.757	155.958±3536.681	98.623±2368.194	56.370±1097.898	2.303±26.387		<0.01**	0.84127	0.547619	<0.01**
GL	TG	TG 16:1_16:1_18:3	0.060±1.494	20.281±468.489	11.608±258.689	5.181±109.501	0.133±1.546		<0.01**	0.690476	0.150794	<0.01**
GL	TG	TG 16:1_16:1_20:4	0.212±3.951	44.644±1011.004	31.614±574.627	19.939±235.016	0.889±7.996		<0.01**	0.150794	0.420635	<0.01**
GL	TG	TG 16:1_16:1_20:5	0.017±0.477	10.813±247.548	8.417±173.620	5.409±59.628	0.100±1.396		<0.01**	0.0952381	0.0952381	<0.01**
GL	TG	TG 16:1_16:1_22:6	0.020±0.777	23.323±533.001	20.114±323.801	15.546±134.465	0.518±5.179		<0.01**	<0.05*	<0.01**	<0.01**
GL	TG	TG 16:1_17:1_18:1	0.328±3.500	493.872±10055.686	284.660±6758.385	155.214±2865.528	5.650±55.186		<0.01**	0.84127	0.150794	<0.01**
GL	TG	TG 16:1_17:1_18:2	0.128±1.208	58.942±1232.762	32.792±701.086	17.317±329.409	0.847±9.430		<0.01**	0.420635	0.0952381	<0.01**
GL	TG	TG 16:1_17:1_18:3	0.020±0.501	6.923±228.529	4.316±106.219	1.824±55.284	0.034±1.085		<0.01**	0.690476	0.420635	<0.01**
GL	TG	TG 16:1_17:1_22:6	0.004±0.009	6.934±159.073	5.915±98.730	4.201±41.257	0.114±1.267		<0.01**	<0.01**	<0.01**	<0.01**
GL	TG	TG 16:1_17:1_24:0	0.015±0.213	100.671±2222.306	40.989±1194.362	17.298±694.391	0.392±3.970		<0.01**	0.0952381	<0.05*	<0.01**
GL	TG	TG 16:1_17:1_24:1	0.011±0.319	29.592±674.087	12.786±318.082	6.159±186.717	0.273±3.188		<0.01**	0.0952381	<0.05*	<0.01**
GL	TG	TG 16:1_18:1_18:1	3.799±17.096	535.293±10752.670	323.553±7546.450	200.491±2819.132	18.807±185.362		<0.01**	1	0.420635	<0.01**
GL	TG	TG 16:1_18:1_22:1	0.349±7.173	78.498±1848.304	41.608±979.712	23.353±464.557	2.432±29.309		<0.01**	0.222222	0.222222	<0.05*
GL	TG	TG 16:1_18:1_24:1	0.130±0.819	64.460±1469.757	31.414±745.063	16.261±437.882	1.034±16.041		<0.01**	0.150794	<0.05*	<0.01**
GL	TG	TG 16:1_18:1_26:1	0.060±0.552	41.262±940.098	20.999±566.583	9.472±275.981	0.599±9.984		<0.01**	0.222222	<0.05*	<0.01**
GL	TG	TG 17:0_18:0_18:1	0.104±0.931	226.415±4963.644	130.220±3178.516	58.120±1818.845	3.116±39.317		<0.01**	0.84127	0.0555556	<0.01**
GL	TG	TG 17:0_18:1_18:1	0.264±1.554	365.630±8076.786	182.200±4349.701	102.383±2382.980	6.160±62.066		<0.01**	0.150794	0.222222	<0.01**
GL	TG	TG 17:1_18:1_18:1	0.260±1.709	169.979±3630.339	95.106±2271.664	57.535±946.225	3.514±34.766		<0.01**	0.309524	0.222222	<0.01**
GL	TG	TG 17:1_18:1_24:0	0.007±0.101	55.572±1280.218	24.575±742.515	10.013±395.140	0.226±3.911		<0.01**	0.0952381	<0.05*	<0.01**
GL	TG	TG 17:1_18:1_24:1	0.007±0.076	23.867±537.288	9.945±279.872	4.508±155.926	0.141±1.765		<0.01**	0.0952381	<0.05*	<0.01**
GL	TG	TG 17:1_18:1_26:0	0.005±0.018	14.143±345.409	6.498±185.763	2.508±97.026	0.059±1.080		<0.01**	0.150794	<0.05*	<0.01**
GL	TG	TG 17:1_18:1_26:1	0.005±0.010	7.911±171.847	3.827±112.066	1.649±56.893	0.044±1.299		<0.01**	0.150794	<0.05*	<0.01**
GL	TG	TG 18:0_18:0_18:1	0.391±2.095	230.681±5181.522	141.170±3187.079	64.670±1957.514	5.734±101.310		<0.01**	1	0.309524	<0.05*
GL	TG	TG 18:0_18:1_18:1	1.639±9.818	403.287±9388.080	220.773±5053.786	120.672±2596.479	13.709±193.002		<0.01**	0.309524	0.309524	<0.05*
GL	TG	TG 18:0_18:1_20:4	1.541±10.759	5.996±149.224	4.684±75.295	3.933±21.842	3.089±57.154		<0.01**	0.0555556	<0.01**	<0.01**
GL	TG	TG 18:0_18:1_22:5	0.676±5.389	2.150±50.803	1.727±35.824	1.695±8.422	1.520±23.243		<0.01**	0.0952381	<0.01**	<0.01**
GL	TG	TG 18:0_18:1_22:6	0.169±1.560	0.386±11.269	0.534±8.234	0.633±6.614	0.738±9.815		<0.01**	<0.01**	<0.01**	<0.01**
GL	TG	TG 18:1_18:1_18:1	0.197±0.997	0.833±16.136	0.794±13.993	0.789±9.954	0.438±4.198		<0.01**	<0.05*	<0.01**	<0.01**
GL	TG	TG 18:1_18:1_18:2	3.386±39.270	26.746±732.981	17.313±232.719	18.183±131.796	5.351±46.353		0.0555556	0.547619	<0.01**	<0.01**
GL	TG	TG 18:1_18:1_19:1	0.078±1.473	42.773±943.911	21.757±513.014	12.824±262.127	0.938±10.885		<0.01**	0.150794	0.222222	<0.01**
GL	TG	TG 18:1_18:1_19:1	0.025±0.941	59.044±1574.665	49.414±1249.765	17.941±527.262	0.827±19.429		<0.01**	0.309524	0.420635	<0.01**
GL	TG	TG 18:1_18:1_22:6	0.239±2.872	1.235±30.743	1.331±25.262	1.311±7.164	0.826±10.312		<0.01**	<0.01**	<0.01**	<0.01**
GL	TG	TG 18:1_18:1_26:0	0.005±0.010	15.740±371.958	8.075±208.806	3.214±112.348	0.131±2.802		<0.01**	0.222222	<0.05*	<0.01**
GL	TG	TG 18:1_18:1_26:1	0.005±0.016	11.822±290.661	5.641±151.578	2.594±77.729	0.131±3.526		<0.01**	0.222222	<0.05*	<0.01**
GL	TG	TG 18:1_18:2_18:2	3.934±9.996	20.058±364.447	14.019±298.814	11.066±49.993	5.896±19.254		<0.01**	<0.05*	<0.01**	<0.01**
GL	TG	TG 18:1_18:2_18:3	0.438±1.443	0.248±3.751	0.277±7.327	0.185±3.576	0.474±1.282		<0.01**	0.150794	0.222222	<0.01**
GL	TG	TG 18:2_18:2_18:3	0.185±0.683	0.263±5.388	0.203±2.773	0.286±9.166	0.311±0.683		<0.01**	0.420635	0.309524	<0.01**
GL	TG	TG 8:0_14:0_16:0	0.033±0.788	316.781±7297.164	149.823±3889.890	52.782±2435.081	0.696±10.680		<0.01**	0.0952381	<0.05*	<0.01**
GL	TG	TG 8:0_14:0_16:1	0.042±2.906	1275.624±28997.659	589.596±15952.625	221.166±9367.150	1.893±28.349		<0.01**	0.0952381	<0.05*	<0.01**
GL	TG	TG 8:0_14:1_15:1	0.031±2.067	937.314±21703.141	375.856±10547.042	132.286±6054.639	0.508±8.817		<0.01**	0.0952381	<0.05*	<0.01**
GL	TG	TG 8:0_15:0_16:0	0.006±0.092	192.595±4472.492	85.319±2241.5339	31.937±1308.719	0.470±6.582		<0.01**	0.0952381	<0.05*	<0.01**
GL	TG	TG 8:0_15:0_16:1	0.025±1.559	823.040±18765.162	337.925±9073.365	129.765±5285.994	1.355±19.594		<0.01**	0.0952381	<0.05*	<0.01**
GL	TG	TG 8:0_16:0_16:0	0.053±0.478	172.694±3839.389	88.548±2212.253	37.349±1229.534	1.330±16.435		<0.01**	0.150794	<0.05*	<0.01**
GL	TG	TG 8:0_16:0_16:1	0.045±1.519	601.516±13737.081	301.351±7818.637	122.931±4030.791	2.392±36.642		<0.01**	0.0952381	<0.05*	<0.01**
GL	TG	TG 8:0_16:1_16:1	0.022±1.019	418.938±9506.500	212.963±5644.771	87.741±2859.207	1.028±15.407		<0.01**	0.150794	<0.05*	<0.01**
GL	TG	TG 8:0_16:1_17:1	0.013±0.565	301.697±6834.718	127.759±3425.616	54.524±1827.289	0.661±9.055		<0.01**	0.0952381	<0.05*	<0.01**
GL	TG-O	TG O-14:0_14:0_16:0	0.004±0.042	5.132±104.936	1.211±38.861	0.475±17.575	0.03±0.438		<0.01**	<0.01**	<0.01**	<0.01**
GL	TG-O	TG O-16:0_14:0_16:0	0.011±0.222	54.19±1117.799	13.908±393.623	5.889±211.115	0.233±3.352		<0.01**	<0.01**	<0.01**	<0.01**
GL	TG-O	TG O-16:0_14:0_16:1	0.027±0.317	24.509±493.119	7.325±202.794	3.552±82.301	0.186±2.47		<0.01**	<0.01**	<0.01**	<0.01**
GL	TG-O	TG O-16:0_14:1_16:1	0.004±0.012	6.427±128.633	2.3±61.606	1.14±24.792	0.017±0.438		<0.01**	<0.01**	<0.01**	<0.01**
GL	TG-O	TG O-16:0_16:0_16:0	0.031±0.402	104.443±2104.006	38.58±1260.144	11.697±331.045	0.742±10.799		<0.01**	0.0952381	<0.01**	<0.01**
GL	TG-O	TG O-16:0_16:0_16:1	0.073±0.398	147.946±3234.181	46.074±1264.832	22.498±739.771	0.915±11.534		<0.01**	<0.01**	<0.01**	<0.01**
GL	TG-O	TG O-16:0_16:0_18:0	0.025±0.323	39.879±878.052	14.354±412.686	4.807±137.701	0.606±11.315		<0.01**	<0.05*	<0.01**	<0.01**
GL	TG-O	TG O-16:0_16:0_18:1	0.186±1.264	188.16±4158.65	69.839±1924.615	30.977±997.915	2.138±32.243		<0.01**	<0.05*	<0.05*	<0.01**
GL	TG-O	TG O-16:0_16:0_22:0	0.004±0.008	5.012±116.348	1.77±52.201	0.558±21.193	0.073±1.859		<0.01**	0.0952381	<0.01**	<0.01**
GL	TG-O	TG O-16:0_16:0_22:1	0.014±0.127	24.162±572.148	9.237±250.932	4.016±128.524	0.37±8.236		<0.01**	0.0952381	<0.05*	<0.01**
GL	TG-O	TG O-16:0_18:1_20:1	0.046±0.394	20.48±447.63	8.395±221.757	4.458±109.426	0.65±11.845		<0.01**	0.150794	<0.05*	<0.05*
GL	TG-O	TG O-16:0_18:1_22:1	0.007±0.193	11.22±264.369	3.979±110.923	1.939±56.619	0.213±4.565		<0.01**	0.0555556	<0.05*	<0.05*
GL	TG-O	TG O-16:0_18:1_22:6	0.072±0.393	1.451±25.894	1.012±17.081	1.112±3.758	0.564±6.659		<0.01**	0.84127	<0.01**	<0.01**
GL	TG-O	TG O-16:1_16:0_16:1	0.025±0.265	24.556±635.528	11.377±292.315	5.989±151.04	0.26±3.102		<0.01**	0.222222	0.0555556	<0.01**
GL	TG-O	TG O-16:1_16:1_18:1	0.013±0.378	6.195±125.905	2.864±73.334	1.912±31.589	0.114±1.621		<0.01**	0.0952381	<0.05*	<0.01**
GL	TG-O	TG O-18:0_16:0_18:0	0.01±0.155	12.163±281.609	4.592±130.157	1.635±42.179	0.288±7.359		<0.01**	0.0952381	<0.01**	<0.05*
GL	TG-O	TG O-18:0_16:0_18:1	0.132±0.849	71.172±1629.329	30.058±818.78	13.33±443.456	1.499±27.734		<0.01**	0.0952381	<0.05*	<0.01**
GL	TG-O	TG O-18:0_18:1_22:1	0.005±0.017	6.627±160.414	2.456±69.864	1.039±34.658	0.091±2.532		<0.01**	0.0952381	<0.05*	<0.01**
GL	TG-O	TG O-18:1_16:0_18:1	0.36±2.869	60.871±1407.641	25.936±643.412	13.303±246.44	2.081±30.063		<0.01**	0.0952381	<0.05*	<0.05*
GL	TG-O	TG O-18:1_16:1_18:1	0.095±0.142	9.029±199.61	3.971±97.382	2.547±39.572	0.34±5.528		<0.01**	0.0952381	0.0952381	<0.05*
GL	TG-O	TG O-22:0_16:0_18:1	0.004±0.005	12.955±310.521	4.466±125.74	1.812±69.161	0.132±2.922		<0.01**	0.0555556	<0.05*	<0.01**
GP	PC	PC 14:0_14:0	0.109±0.583	1.157±9.195	0.583±5.708	0.448±4.808	0.625±17.093		<0.01**	<0.01**	<0.01**	0.0952381
GP	PC	PC 14:0_14:1	0.002±0.022	0.591±3	0.295±4.367	0.177±4.139	0.034±0.598		<0.01**	<0.01**	<0.01**	<0.01**
GP	PC	PC 14:0_15:0	0.189±1.009	4.332±42.037	2.148±23.526	1.661±18.482	1.077±21.733		<0.01**	<0.01**	<0.01**	<0.01**
GP	PC	PC 14:0_15:1	0.004±0.009	1.251±8.835	0.495±9.367	0.286±6.283	0.051±1.067		<0.01**	<0.01**	<0.01**	<0.01**
GP	PC	PC 14:0_16:1	0.557±2.81	16.017±91.999	9.224±105.489	6.692±83.559	3.637±92.214		<0.01**	<0.01**	<0.01**	<0.01**
GP	PC	PC 14:0_20:4	0.429±2.012	0.811±8.299	0.56±5.047	0.49±5.168	0.691±19.178		<0.01**	0.0555556	<0.05*	0.150794
GP	PC	PC 14:1_16:1	0.025±0.17	0.847±5.971	0.488±8.856	0.277±5.881	0.064±1.824		<0.01**	<0.05*	<0.01**	<0.01**
GP	PC	PC 15:0_15:0	3.262±12.08	7.311±75.389	4.218±31.523	3.648±10.099	5.214±68.169		<0.01**	<0.01**	<0.01**	0.0952381
GP	PC	PC 15:0_16:0	1.351±7.551	13.607±107.511	7.565±73.364	6.095±69.248	3.529±42.876		<0.01**	<0.01**	<0.01**	<0.01**
GP	PC	PC 15:0_16:1	0.575±3.277	75.57±649.207	44.953±594.296	31.596±566.15	5.379±109.806		<0.01**	<0.05*	<0.05*	<0.01**
GP	PC	PC 15:0_16:2	0.01±0.237	5.951±47.883	2.827±55.145	1.575±36.244	0.189±7.038		<0.01**	<0.01**	<0.01**	<0.01**
GP	PC	PC 15:0_20:5	0.235±0.721	1.628±14.539	0.66±7.478	0.501±7.21	0.26±5.697		<0.01**	<0.01**	<0.01**	<0.01**
GP	PC	PC 15:0_22:5	0.102±2.814	0.959±10.728	0.564±4.308	0.5±6.682	0.341±5.274		<0.01**	<0.01**	<0.05*	<0.01**
GP	PC	PC 16:0_16:0	7.099±38.647	14.55±78.924	9.431±79.175	7.951±75.49	6.964±89.951		<0.01**	<0.01**	<0.01**	<0.01**
GP	PC	PC 16:0_17:0	0.69±8.137	10.604±120.384	3.929±52.853	2.773±36.536	1.158±16.7		<0.01**	<0.01**	<0.01**	<0.01**
GP	PC	PC 16:0_17:1	1.296±5.358	85.588±689.235	54.147±612.411	39.146±578.373	9.356±123.168		<0.01**	<0.05*	<0.05*	<0.01**
GP	PC	PC 16:0_18:1	0.351±0.784	0.786±2.708	0.689±2.373	0.574±9.607	0.561±2.887		<0.01**	<0.05*	0.0555556	<0.01**
GP	PC	PC 16:1_16:1	0.934±4.823	95.697±552.074	70.105±798.323	50.509±690.346	7.564±160.724		<0.01**	<0.05*	<0.05*	<0.01**
GP	PC	PC 16:1_16:2	0.059±1.682	0.336±1.717	0.268±6.238	0.182±1.565	0.144±7.623		<0.01**	0.222222	<0.01**	0.150794
GP	PC	PC 16:1_17:1	0.322±1.346	41.217±377.846	28.018±369.444	20.228±361.036	2.579±34.121		<0.01**	0.0555556	<0.05*	<0.01**
GP	PC	PC 16:1_17:2	0.041±0.422	0.557±5.222	0.309±2.194	0.237±3.948	0.107±3.704		<0.01**	<0.01**	<0.01**	<0.01**
GP	PC	PC 16:1_18:1	8.15±25.407	53.535±371.492	41.747±321.71	36.981±189.943	21.464±214.288		<0.01**	0.0952381	<0.05*	<0.01**
GP	PC	PC 16:1_18:2	1.682±34.587	7.487±48.999	4.778±48.862	3.807±37.552	1.544±8.236		<0.01**	<0.05*	<0.01**	<0.01**
GP	PC	PC 16:1_20:3	0.427±10.545	0.935±8.597	0.603±5.513	0.518±5.146	0.459±11.614		<0.05*	<0.05*	<0.05*	<0.05*
GP	PC	PC 16:1_20:4	0.28±3.224	2.73±19.678	1.325±28.904	1.232±9.57	0.755±10.45		<0.01**	<0.01**	<0.01**	<0.01**
GP	PC	PC 17:0_18:0	0.113±0.665	2.676±29.955	1.274±12.994	0.971±12.816	0.475±12.182		<0.01**	<0.05*	<0.01**	<0.01**
GP	PC	PC 17:0_18:1	1.337±9.716	57.492±511.214	36.964±373.709	29.167±333.558	10.219±175.022		<0.01**	<0.05*	<0.05*	<0.01**
GP	PC	PC 17:0_18:4	0.271±0.974	2.622±22.556	1.217±9.758	1.012±14.008	0.648±11.477		<0.01**	<0.01**	<0.01**	<0.01**
GP	PC	PC 17:0_20:4	0.261±2.858	1.276±9.407	0.792±7.203	0.644±14.726	0.3±10.877		<0.01**	<0.05*	<0.05*	<0.01**
GP	PC	PC 17:1_18:1	0.56±5.288	18.439±160.518	12.811±122.584	10.381±108.154	3.53±52.317		<0.01**	0.0555556	<0.05*	<0.01**
GP	PC	PC 17:1_18:2	0.105±0.561	0.767±6.074	0.47±3.874	0.41±2.828	0.227±3.167		<0.01**	<0.05*	<0.01**	<0.01**
GP	PC	PC 17:1_20:5	0.083±0.476	0.688±5.306	0.377±5.21	0.28±4.842	0.116±2.064		<0.01**	<0.01**	<0.01**	<0.01**
GP	PC	PC 18:0_18:0	0.161±1.248	0.401±6.82	0.261±1.64	0.255±2.06	0.327±9.84		<0.01**	0.0555556	0.0555556	0.309524
GP	PC	PC 18:0_18:1	12.708±49.998	66.839±671.256	65.819±380.74	59.281±233.191	52.313±1056.343		<0.01**	0.547619	0.150794	0.547619
GP	PC	PC 18:0_19:2	0.211±2.228	3.932±36.682	2.699±30.406	2.302±11.65	1.468±28.789		<0.01**	0.0555556	<0.05*	<0.05*
GP	PC	PC 18:0_20:1	0.149±1.136	1.813±24.874	1.891±17.059	1.604±12.02	1.374±28.34		<0.01**	0.84127	0.309524	0.547619
GP	PC	PC 18:0_20:3	2.817±16.515	1.931±17.994	2.303±13.144	2.695±8.384	3.218±48.616		<0.01**	0.0952381	<0.01**	<0.01**
GP	PC	PC 18:0_20:5	5.469±28.493	1.14±8.151	1.339±9.188	1.841±24.113	2.702±33.976		<0.01**	0.0952381	<0.01**	<0.01**
GP	PC	PC 18:1_18:1	16.192±62.595	34.609±285.472	33.995±171.964	33.177±48.31	29.159±51.827		<0.01**	0.547619	0.150794	0.150794
GP	PC	PC 18:1_19:2	0.248±2.479	0.91±8.491	0.657±3.275	0.633±2.771	0.468±8.793		<0.01**	0.150794	0.150794	<0.05*
GP	PC	PC 18:1_20:5	4.369±5.508	1.066±27.978	1.714±9.473	1.924±10.209	3.125±53.659		<0.01**	0.222222	<0.05*	<0.01**
GP	PC	PC 18:1_22:1	0.063±0.76	0.66±8.898	0.701±7.337	0.552±5.648	0.473±10.485		<0.01**	0.690476	0.309524	0.547619
GP	PC	PC 18:2_20:5	0.237±0.853	1.908±18.25	1.259±16.191	0.892±13.905	0.473±13.961		<0.01**	0.0555556	<0.05*	<0.01**
GP	PC	PC 18:3_18:3	0.453±2.031	1.29±9.337	0.791±8.255	0.575±3.272	0.477±14.407		<0.01**	<0.05*	<0.01**	<0.05*
GP	PC	PC 19:0_18:1	0.068±0.421	4.043±47.642	2.476±28.676	1.835±33.563	0.682±11.012		<0.01**	0.0555556	<0.05*	<0.01**
GP	PC	PC 19:0_20:2	0.011±0.188	0.234±3.102	0.224±2.02	0.195±1.295	0.153±4.381		<0.01**	0.547619	0.222222	0.150794
GP	PC	PC 19:0_20:3	0.069±0.326	0.29±2.807	0.194±1.798	0.171±2.041	0.198±4.582		<0.01**	0.0952381	0.0555556	0.150794
GP	PC	PC 19:0_20:5	0.047±0.762	0.318±3.306	0.209±1.841	0.176±1.634	0.141±1.261		<0.01**	0.0555556	<0.05*	<0.01**
GP	PC	PC 19:1_19:1	0.457±3.601	3.456±37.623	3.479±24.827	3.274±7.997	3.638±78.595		<0.01**	0.84127	0.150794	0.547619
GP	PC	PC 19:1_20:5	0.022±0.071	0.261±2.319	0.165±0.978	0.136±1.323	0.114±0.956		<0.01**	<0.05*	<0.05*	<0.01**
GP	PC	PC 19:2_19:2	8.151±33.712	3.137±18.988	3.717±12.374	4.53±26.691	7.073±123.919		<0.01**	<0.05*	<0.01**	<0.01**
GP	PC	PC 19:2_20:5	0.006±0.155	0.35±3.336	0.215±1.775	0.157±2.233	0.075±1.748		<0.01**	<0.05*	<0.05*	<0.01**
GP	PC	PC 20:1_20:2	0.255±1.859	0.285±3.264	0.372±1.858	0.364±4.046	0.579±13.647		0.150794	<0.05*	0.0952381	<0.01**
GP	PC	PC 20:2_20:2	0.263±4.171	0.498±5.554	0.578±3.784	0.541±4.685	0.85±10.974		<0.05*	0.222222	0.547619	<0.01**
GP	PC	PC 20:2_20:3	0.964±3.469	0.811±6.969	0.876±3.608	0.892±3.859	1.418±26.144		0.0952381	0.547619	0.420635	<0.01**
GP	PC	PC 20:3_20:3	0.443±1.67	0.666±6.747	0.712±4.1	0.824±6.57	1.843±36.874		0.0952381	0.690476	0.420635	<0.01**
GP	PC	PC 20:3_20:4	0.47±2.892	0.825±8.567	0.97±4.575	1.106±10.131	2.396±65.384		<0.05*	0.0952381	0.222222	<0.01**
GP	PC	PC 20:4_20:4	0.063±0.288	0.115±1.233	0.09±0.591	0.087±0.4	0.133±4.288		<0.05*	0.150794	0.150794	0.547619
GP	PC	PC 21:1_21:1	0.045±0.294	0.18±2.335	0.2±1.655	0.183±1.095	0.271±8.424		<0.01**	0.690476	0.84127	1
GP	PC	PC 22:0_18:1	0.069±0.424	0.937±13.63	0.914±10.472	0.683±9.854	0.462±12.935		<0.01**	1	0.309524	<0.05*
GP	PC	PC 22:2_22:3	0.017±0.143	0.013±0.245	0.017±0.24	0.025±0.257	0.046±1.524		0.420635	0.309524	<0.05*	<0.01**
GP	PC	PC 24:0_18:1	0.034±0.245	0.396±6.051	0.465±4.919	0.36±3.8	0.373±10.225		<0.01**	0.547619	0.420635	0.547619
GP	PC	PC 32:1	0.168±2.236	0.773±2.531	0.625±3.422	0.595±2.11	0.39±1.962		<0.01**	<0.01**	<0.01**	<0.01**
GP	PC-O	PC O-14:0	0.003±0.033	0.018±0.128	0.009±0.085	0.008±0.099	0.01±0.268		<0.01**	<0.01**	<0.01**	0.150794
GP	PC-O	PC O-16:1_16:1	0.135±0.966	1.566±10.107	1.471±8.513	1.376±10.185	0.744±9.498		<0.01**	0.420635	0.420635	<0.01**
GP	PC-O	PC O-16:1_18:1	0.385±7.231	3.831±53.48	3.377±29.739	3.091±16.188	1.99±22.475		<0.01**	0.690476	0.547619	<0.05*
GP	PC-O	PC O-16:1_20:4	1.041±1.656	0.754±5.721	1.163±12.272	1.493±11.634	1.945±19.841		<0.01**	<0.01**	<0.01**	<0.01**
GP	PC-O	PC O-17:1	0.002±0.007	0.244±2.277	0.137±2.465	0.102±1.436	0.014±0.299		<0.01**	<0.05*	<0.01**	<0.01**
GP	PC-O	PC O-18:1_20:3	0.228±2.004	0.035±0.943	0.101±1.353	0.137±1.711	0.157±3.307		<0.01**	<0.01**	<0.01**	<0.05*
GP	PC-O	PC O-18:2	0.04±0.554	0.016±0.139	0.017±0.116	0.021±0.318	0.04±0.812		<0.01**	0.84127	0.309524	<0.01**
GP	PC-O	PC O-18:3	0.007±0.073	0.002±0.033	0.001±0.007	0.001±0.022	0.002±0.085		<0.01**	0.0952381	0.150794	0.690476
GP	PC-O	PC O-19:4	0±0.001	0.001±0.034	0.001±0.011	0.001±0.011	0.002±0.086		<0.01**	0.84127	0.84127	0.150794
GP	PC-O	PC O-20:1	0.001±0.015	0.009±0.087	0.008±0.087	0.009±0.095	0.012±0.288		<0.01**	0.690476	0.690476	1
GP	PC-O	PC O-20:2	0.001±0.013	0.003±0.039	0.003±0.035	0.003±0.047	0.006±0.176		<0.01**	0.547619	0.84127	0.0952381
GP	PC-O	PC O-20:3	0.024±0.317	0.012±0.157	0.013±0.055	0.016±0.248	0.033±1.525		<0.05*	0.420635	0.420635	0.0555556
GP	PC-O	PC O-20:4	0.037±0.525	0.02±0.167	0.018±0.155	0.022±0.221	0.046±1.11		<0.01**	0.420635	0.84127	<0.01**
GP	PC-O	PC O-20:5	0.042±0.654	0.007±0.135	0.008±0.124	0.008±0.221	0.022±0.55		<0.01**	0.84127	0.690476	<0.05*
GP	PC-O	PC O-22:0_20:4	0.001±0.007	0.049±0.643	0.05±0.387	0.043±0.215	0.044±0.96		<0.01**	0.84127	0.222222	0.547619
GP	PC-O	PC O-30:1	0.023±0.275	0.11±1.068	0.068±1.016	0.051±0.558	0.051±2.109		<0.01**	0.0555556	<0.05*	0.150794
GP	PC-O	PC O-31:0	0.044±0.327	0.601±4.27	0.273±2.847	0.204±2.394	0.107±1.451		<0.01**	<0.01**	<0.01**	<0.01**
GP	PC-O	PC O-31:1	0.043±0.363	0.457±3.109	0.316±2.127	0.322±2.566	0.147±1.263		<0.01**	<0.05*	<0.05*	<0.01**
GP	PC-O	PC O-31:2	0.01±0.17	0.105±0.833	0.062±0.617	0.062±0.399	0.029±0.609		<0.01**	<0.05*	<0.01**	<0.01**
GP	PC-O	PC O-32:0	0.37±2.302	1.425±14.429	1.073±9.764	0.918±7.181	0.868±20.159		<0.01**	0.0952381	0.0952381	0.150794
GP	PC-O	PC O-32:1	0.597±3.163	1.539±12.645	1.983±5.857	2.235±6.071	2.077±27.632		<0.01**	<0.01**	<0.01**	<0.01**
GP	PC-O	PC O-33:0	0.016±0.149	0.156±1.87	0.114±1.259	0.09±0.882	0.069±1.819		<0.01**	0.0952381	<0.05*	<0.05*
GP	PC-O	PC O-33:1	0.096±0.51	0.968±7.451	0.565±6.093	0.427±5.207	0.304±5.233		<0.01**	<0.05*	<0.01**	<0.01**
GP	PC-O	PC O-33:2	0.002±0.044	0.075±1.156	0.043±0.928	0.039±0.598	0.009±0.327		<0.01**	0.0952381	<0.05*	<0.01**
GP	PC-O	PC O-33:7	0.118±0.639	0.068±1.576	0.043±0.798	0.063±0.658	0.097±2.064		<0.05*	0.420635	1	0.420635
GP	PC-O	PC O-34:0	0.106±0.787	0.272±3.864	0.271±1.935	0.265±1.036	0.383±13.49		<0.01**	0.547619	0.547619	0.84127
GP	PC-O	PC O-34:6	0.054±0.32	0.006±0.036	0.005±0.031	0.005±0.023	0.011±0.376		<0.01**	0.150794	0.0952381	0.0952381
GP	PC-O	PC O-34:7	0.017±1.01	0.493±5.242	0.199±2.732	0.131±2.706	0.052±0.765		<0.01**	<0.01**	<0.01**	<0.01**
GP	PC-O	PC O-35:1	0.017±0.141	0.254±2.692	0.185±2.027	0.158±1.042	0.098±1.548		<0.01**	0.0952381	0.0555556	<0.05*
GP	PC-O	PC O-35:2	0.023±0.37	0.152±1.264	0.121±1.775	0.107±1.093	0.073±0.502		<0.01**	0.420635	<0.05*	<0.01**
GP	PC-O	PC O-35:7	0.221±2.282	1.768±19.843	1.358±11.253	1.182±7.859	1.213±16.669		<0.01**	0.150794	0.0555556	0.0555556
GP	PC-O	PC O-36:1	0.08±0.542	0.44±5.211	0.485±3.332	0.483±0.8	0.58±20.323		<0.01**	0.84127	1	0.547619
GP	PC-O	PC O-36:2	0.031±0.247	0.433±5.175	0.532±3.655	0.518±0.816	0.443±13.08		<0.01**	0.309524	0.0952381	0.547619
GP	PC-O	PC O-36:3	0.3±1.337	1.266±11.452	1.568±7.53	1.592±2.68	1.248±23.95		<0.01**	0.0555556	<0.01**	0.547619
GP	PC-O	PC O-36:6	2.136±6.351	0.544±4.169	0.897±8	1.354±13.431	1.844±30.361		<0.01**	<0.01**	<0.01**	<0.01**
GP	PC-O	PC O-36:7	0.019±0.572	0.187±1.998	0.119±1.469	0.107±0.931	0.08±1.416		<0.01**	0.0952381	<0.05*	<0.05*
GP	PC-O	PC O-37:3	0.005±0.169	0.045±0.929	0.044±0.61	0.06±0.779	0.031±0.443		<0.05*	0.690476	0.547619	0.150794
GP	PC-O	PC O-37:6	0.133±0.402	0.054±0.849	0.044±0.521	0.058±0.592	0.094±1.205		<0.01**	0.420635	0.547619	0.0555556
GP	PC-O	PC O-37:7	0.124±0.654	0.327±3.469	0.441±2.367	0.504±2.64	0.814±14.959		<0.01**	0.0555556	<0.01**	<0.01**
GP	PC-O	PC O-38:1	0.01±0.108	0.105±1.896	0.112±0.986	0.104±0.446	0.115±3.629		<0.01**	0.84127	0.84127	0.84127
GP	PC-O	PC O-38:2	0.014±0.112	0.084±1.004	0.073±1.494	0.072±1.451	0.118±4.209		<0.01**	0.690476	0.84127	0.690476
GP	PC-O	PC O-38:5	0.581±1.521	0.184±1.574	0.292±2.096	0.388±3.593	0.665±9.508		<0.01**	<0.01**	<0.01**	<0.01**
GP	PC-O	PC O-38:6	1.23±4.095	0.091±0.713	0.196±2.26	0.311±4.162	0.57±9.279		<0.01**	<0.01**	<0.01**	<0.01**
GP	PC-O	PC O-38:7	0.98±5.36	0.24±2.166	0.538±7.924	0.622±4.9	0.8±11.932		<0.01**	<0.01**	<0.01**	<0.01**
GP	PC-O	PC O-39:1	0.003±0.006	0.104±2.555	0.118±1.523	0.082±1.616	0.03±1.191		<0.01**	0.84127	0.420635	<0.05*
GP	PC-O	PC O-39:2	0.002±0.037	0.233±4.793	0.294±1.772	0.291±2.08	0.146±5.797		<0.01**	0.309524	0.547619	0.420635
GP	PC-O	PC O-40:2	0.005±0.052	0.095±2.233	0.092±1.204	0.073±0.803	0.067±1.938		<0.01**	0.420635	0.150794	0.547619
GP	PC-O	PC O-40:6	0.094±0.428	0.024±0.388	0.06±0.739	0.074±0.81	0.139±2.076		<0.01**	<0.01**	<0.01**	<0.01**
GP	PC-O	PC O-40:7	0.039±0.164	0.03±1.059	0.032±0.418	0.038±0.881	0.093±1.622		0.150794	0.309524	0.547619	<0.05*
GP	PC-O	PC O-40:8	0.048±0.17	0.022±0.343	0.049±0.813	0.083±0.933	0.17±1.047		<0.01**	<0.05*	<0.01**	<0.01**
GP	PE	PE 14:0_16:0	0.068±0.508	0.611±5.76	0.321±3.743	0.224±3.471	0.243±6.826		<0.01**	<0.05*	<0.01**	<0.05*
GP	PE	PE 14:0_16:1	0.005±0.08	1.999±16.183	1.092±18.496	0.671±15.569	0.104±2.364		<0.01**	<0.05*	<0.01**	<0.01**
GP	PE	PE 15:0_16:0	0.002±0.004	0.125±0.66	0.047±0.925	0.022±0.916	0.003±0.035		<0.01**	<0.01**	<0.01**	<0.01**
GP	PE	PE 15:0_16:1	0.002±0.007	2.32±23.833	1.209±21.014	0.68±21.526	0.02±0.312		<0.01**	<0.05*	<0.05*	<0.01**
GP	PE	PE 15:0_16:2	0.002±0.003	0.411±3.781	0.185±3.931	0.093±3.207	0.003±0.029		<0.01**	<0.05*	<0.01**	<0.01**
GP	PE	PE 15:0_22:6	0.009±0.117	2.349±30.61	1.3±21.298	0.731±23.286	0.12±2.553		<0.01**	<0.05*	<0.05*	<0.01**
GP	PE	PE 16:0_16:0	0.035±0.164	0.332±3.294	0.142±2.264	0.086±1.879	0.046±0.866		<0.01**	<0.01**	<0.01**	<0.01**
GP	PE	PE 16:0_16:1	0.02±0.442	7.918±71.039	5.715±87.736	3.47±82.8	0.266±3.89		<0.01**	0.0952381	<0.05*	<0.01**
GP	PE	PE 16:0_17:0	0.002±0.026	0.295±2.832	0.094±1.674	0.054±1.682	0.013±0.179		<0.01**	<0.01**	<0.01**	<0.01**
GP	PE	PE 16:0_20:3	0.262±2.122	3.132±32.477	2.415±31.188	1.569±36.409	0.507±10.731		<0.01**	0.0952381	<0.05*	<0.01**
GP	PE	PE 16:1_16:1	0.003±0.041	10.258±90.377	6.867±113.089	4.243±103.388	0.141±2.221		<0.01**	0.0555556	<0.05*	<0.01**
GP	PE	PE 16:1_17:1	0.006±0.195	34.359±371.43	21.846±376.865	12.618±390.383	0.352±4.129		<0.01**	0.0555556	<0.05*	<0.01**
GP	PE	PE 16:1_18:1	1.213±7.438	99.119±930.602	75.782±900.473	54.694±810.052	9.283±221.404		<0.01**	0.0952381	<0.05*	<0.01**
GP	PE	PE 16:1_18:2	0.085±1.771	5.043±75.895	4.317±52.623	3.198±51.493	0.425±5.58		<0.01**	0.420635	0.0555556	<0.01**
GP	PE	PE 17:0_16:1	0.057±0.36	54.016±552.932	31.361±503.082	18.138±544.437	0.869±11.523		<0.01**	<0.05*	<0.05*	<0.01**
GP	PE	PE 17:0_18:0	0.009±0.078	1.885±22.756	0.631±9.202	0.365±9.725	0.078±1.609		<0.01**	<0.01**	<0.01**	<0.01**
GP	PE	PE 17:0_18:1	0.057±0.426	9.199±107.405	5.02±75.499	2.52±91.381	0.522±8.606		<0.01**	<0.05*	<0.05*	<0.01**
GP	PE	PE 17:0_18:3	0.023±0.372	1.66±42.318	1.269±14.646	0.916±18.384	0.183±5.716		<0.01**	0.547619	0.222222	<0.01**
GP	PE	PE 17:0_18:5	0.004±0.062	0.273±1.172	0.153±1.76	0.132±1.266	0.074±0.944		<0.01**	<0.01**	<0.01**	<0.01**
GP	PE	PE 17:0_20:3	0.033±0.169	1.83±21.099	0.789±21.894	0.582±13.657	0.128±2.12		<0.01**	<0.05*	<0.01**	<0.01**
GP	PE	PE 17:1_18:1	0.079±0.411	21.732±225.536	13.136±205.173	8.155±209.993	0.684±7.772		<0.01**	0.0555556	<0.05*	<0.01**
GP	PE	PE 18:0_18:1	1.174±6.139	9.671±113.266	8.69±72.88	7.035±57.988	5.457±127.982		<0.01**	0.222222	0.150794	<0.05*
GP	PE	PE 18:0_20:1	0.095±0.657	0.842±11.048	0.738±6.529	0.591±5.419	0.637±13.143		<0.01**	0.150794	0.150794	0.547619
GP	PE	PE 18:0_22:3	0.631±4.406	1.441±21.39	1.333±8.173	1.286±8.681	1.228±33.858		<0.05*	0.309524	0.309524	0.547619
GP	PE	PE 18:0_22:4	0.408±3.038	1.327±17.075	1.558±7.028	1.229±10.123	1.137±16.517		<0.01**	0.420635	0.84127	0.309524
GP	PE	PE 18:1_19:1	0.039±0.284	2.593±27.817	1.3±18.835	0.883±22.676	0.195±2.375		<0.01**	<0.01**	<0.05*	<0.01**
GP	PE	PE 18:1_20:1	0.217±4.504	1.419±22.446	0.715±10.067	0.446±7.667	0.322±8.832		<0.01**	<0.01**	<0.01**	<0.01**
GP	PE	PE 18:2_19:2	0.022±0.128	1.76±45.821	1.109±26.389	0.633±22.959	0.104±1.492		<0.01**	0.222222	0.150794	<0.01**
GP	PE	PE 19:0_18:1	0.029±0.231	2.252±75.696	1.016±36.437	0.783±7.168	0.271±6.607		<0.01**	0.150794	0.0555556	<0.01**
GP	PE	PE 19:0_20:4	0.017±0.2	1.335±16	0.68±10.678	0.448±10.821	0.113±1.436		<0.01**	<0.05*	<0.05*	<0.01**
GP	PE	PE 19:0_20:5	0.012±0.377	0.393±5.448	0.193±5.264	0.167±3.263	0.029±0.605		<0.01**	0.0555556	<0.05*	<0.01**
GP	PE	PE 19:1_20:5	0.004±0.067	0.627±7.955	0.451±4.754	0.327±5.076	0.061±1.106		<0.01**	0.0952381	<0.05*	<0.01**
GP	PE	PE 19:2_18:3	0.359±31.231	1.62±15.434	0.728±16.248	0.861±31.985	0.063±0.843		<0.05*	<0.05*	0.0952381	<0.01**
GP	PE	PE 19:2_20:5	0.002±0.067	0.296±3.887	0.196±2.65	0.124±3.169	0.053±3.953		<0.01**	0.0952381	<0.05*	<0.05*
GP	PE	PE 20:0_20:1	0.026±0.183	0.044±0.743	0.062±0.424	0.065±0.342	0.088±2.396		0.150794	0.0952381	<0.05*	<0.05*
GP	PE	PE 21:0_21:1	0.016±0.12	0.019±0.536	0.034±0.274	0.038±0.254	0.071±2.301		1	0.0555556	<0.05*	<0.01**
GP	PE	PE 22:2_22:3	0.002±0.02	0.039±0.726	0.027±0.357	0.023±0.471	0.006±0.141		<0.01**	0.150794	0.0952381	<0.01**
GP	PE	PE 34:0	0.149±1.249	1.73±29.509	0.864±11.885	0.51±14.189	0.332±5.316		<0.01**	<0.01**	<0.01**	<0.01**
GP	PE	PE 34:1	1.699±9.13	83.176±807.49	57.206±736.691	38.039±698.91	10.386±148.811		<0.01**	0.0952381	<0.05*	<0.01**
GP	PE	PE 36:2	4.306±24.569	37.171±383.816	33.556±347.679	24.763±306.949	12.697±198.354		<0.01**	0.420635	<0.05*	<0.01**
GP	PE	PE 36:4	1.542±21.475	32.753±338.653	25.991±285.67	18.093±338.626	8.964±230.333		<0.01**	0.0952381	<0.05*	<0.01**
GP	PE	PE 36:5	1.229±5.824	9.633±108.025	8.359±94.32	5.753±112.658	2.221±44.379		<0.01**	0.309524	<0.05*	<0.01**
GP	PE	PE 36:6	0.098±0.916	9.42±89.912	5.738±96.218	3.262±93.335	0.124±2.939		<0.01**	0.0555556	<0.05*	<0.01**
GP	PE	PE 38:3	4.013±26.098	7.556±105.936	7.173±43.298	6.409±50.653	4.149±113.94		<0.05*	0.547619	0.420635	0.150794
GP	PE	PE 38:4	6.932±25.869	26.916±280.971	26.239±155.268	23.182±180.531	15.603±231.564		<0.01**	0.84127	0.309524	<0.05*
GP	PE	PE 38:5	3.509±22.882	20.568±222.349	16.369±150.629	12.788±191.781	7.787±192.766		<0.01**	0.0952381	<0.05*	<0.05*
GP	PE	PE 38:6	1.23±8.3	10.866±133.853	11.411±125.333	8.207±129.147	4.938±78.099		<0.01**	1	0.420635	<0.05*
GP	PE	PE 38:7	0.126±1.758	8.3±89.128	6.014±89.8	3.745±75	0.502±9.27		<0.01**	0.150794	<0.05*	<0.01**
GP	PE	PE 40:6	0.671±3.556	2.421±30.229	2.044±17.075	1.592±22.91	1.048±28.272		<0.01**	0.222222	0.0952381	<0.05*
GP	PE	PE 40:7	0.647±4.984	5.895±73.144	5.853±54.128	4.616±50.682	2.9±49.378		<0.01**	1	0.309524	<0.05*
GP	PE-O	PE O-14:1_20:4	0.217±0.841	0.439±4.781	0.327±2.039	0.296±2.721	0.323±7.77		<0.01**	0.150794	0.0555556	0.222222
GP	PE-O	PE O-14:1_20:5	0.259±0.906	0.141±1.551	0.093±0.906	0.096±0.438	0.145±3.351		<0.01**	0.0555556	0.0555556	0.547619
GP	PE-O	PE O-15:1_16:1	0.002±0.01	0.359±3.069	0.136±2.538	0.073±2.328	0.003±0.03		<0.01**	<0.01**	<0.01**	<0.01**
GP	PE-O	PE O-15:1_20:3	0.031±0.167	0.225±2.43	0.156±1.363	0.132±1.112	0.074±1.712		<0.01**	0.0952381	<0.05*	<0.05*
GP	PE-O	PE O-15:1_20:4	0.028±0.283	0.386±4.019	0.17±2.166	0.11±1.706	0.053±0.784		<0.01**	<0.01**	<0.01**	<0.01**
GP	PE-O	PE O-15:1_20:5	0.051±0.28	0.224±2.712	0.118±1.09	0.097±1.447	0.053±1.209		<0.01**	<0.05*	<0.05*	<0.01**
GP	PE-O	PE O-15:1_22:6	0.047±1.095	4.24±52.35	1.923±30.561	1.195±27.661	0.365±5.275		<0.01**	<0.05*	<0.01**	<0.01**
GP	PE-O	PE O-16:0_18:1	0.245±1.792	2.494±35.208	1.167±19.298	0.693±19.669	0.37±9.724		<0.01**	<0.05*	<0.05*	<0.01**
GP	PE-O	PE O-16:1_16:0	0.06±0.513	0.812±8.023	0.541±5.685	0.409±6.479	0.26±3.486		<0.01**	0.0555556	<0.05*	<0.01**
GP	PE-O	PE O-16:1_16:1	0.027±0.167	2.959±22.432	1.602±23.926	1.008±22.275	0.164±3.746		<0.01**	<0.01**	<0.01**	<0.01**
GP	PE-O	PE O-16:1_17:0	0.007±0.098	0.673±10.282	0.235±4.214	0.14±3.782	0.032±0.858		<0.01**	<0.01**	<0.01**	<0.01**
GP	PE-O	PE O-16:1_17:1	0.02±0.131	1.64±14.875	0.845±12.399	0.542±8.958	0.122±2.553		<0.01**	<0.05*	<0.01**	<0.01**
GP	PE-O	PE O-16:1_18:1	0.577±3.037	5.398±54.919	4.335±40.949	3.371±26.854	2.472±55.813		<0.01**	0.0952381	<0.05*	<0.05*
GP	PE-O	PE O-16:1_18:3	0.422±2.59	1.237±13.195	1.092±4.817	0.789±13.822	0.941±36.934		<0.01**	0.150794	<0.05*	0.150794
GP	PE-O	PE O-16:1_20:3	0.75±4.209	1.916±19.859	1.773±8.138	1.717±5.024	1.567±37.268		<0.01**	0.309524	0.150794	0.547619
GP	PE-O	PE O-16:1_20:4	6.809±24.301	29.036±262.131	25.035±150.764	22.842±154.52	19.081±273.913		<0.01**	0.150794	0.150794	<0.05*
GP	PE-O	PE O-16:1_20:5	1.747±5.51	1.119±10.487	1.071±3.34	1.188±4.918	1.505±10.359		<0.01**	0.309524	0.84127	<0.01**
GP	PE-O	PE O-16:1_22:1	0.314±2.274	2.852±42.242	2.765±21.124	2.428±18.577	2.132±56.746		<0.01**	0.84127	0.420635	0.547619
GP	PE-O	PE O-16:1_22:6	5.718±28.746	23.575±231.597	20.931±125.22	20.286±82.641	30.923±664.776		<0.01**	0.150794	0.150794	1
GP	PE-O	PE O-16:2_16:1	0.014±0.207	0.956±10.966	0.664±9.501	0.421±9.502	0.054±1.677		<0.01**	0.0952381	<0.05*	<0.01**
GP	PE-O	PE O-17:0_18:1	0.009±0.233	0.848±14.813	0.385±6.862	0.214±7.654	0.054±1.329		<0.01**	0.0952381	<0.05*	<0.01**
GP	PE-O	PE O-17:1_18:1	0.131±0.662	5.298±73.314	3.962±40.025	3.2±43.185	1.346±23.108		<0.01**	0.0952381	<0.05*	<0.01**
GP	PE-O	PE O-17:1_20:1	0.053±0.543	0.847±11.664	0.713±6.923	0.556±5.417	0.369±8.527		<0.01**	0.150794	0.150794	<0.05*
GP	PE-O	PE O-17:1_20:3	0.208±1.321	1.633±23.785	1.386±10.679	1.168±11.387	0.577±11.466		<0.01**	0.150794	0.150794	<0.05*
GP	PE-O	PE O-17:1_20:4	0.885±3.398	4.077±61.861	3.109±34.649	3.067±28.243	1.978±25.916		<0.01**	0.309524	0.222222	<0.05*
GP	PE-O	PE O-17:1_20:5	3.037±7.016	5.809±50.132	3.376±25.938	3.158±20.311	3.512±85.227		<0.01**	<0.01**	<0.01**	0.0952381
GP	PE-O	PE O-17:1_22:5	0.211±1.241	1.697±18.119	1.213±13.854	0.801±24.905	0.642±7.335		<0.01**	0.0555556	<0.05*	<0.01**
GP	PE-O	PE O-17:1_22:6	0.064±1.115	1.288±14.893	0.987±12.384	0.738±12.196	0.559±11.06		<0.01**	0.0952381	<0.05*	<0.05*
GP	PE-O	PE O-17:2_16:1	0.046±0.264	2.057±20.122	1.355±16.283	0.962±13.421	0.213±6.221		<0.01**	0.0555556	<0.05*	<0.01**
GP	PE-O	PE O-17:2_22:6	0.034±0.393	0.565±8.045	0.394±4.631	0.317±4.55	0.208±3.102		<0.01**	0.0952381	<0.05*	<0.05*
GP	PE-O	PE O-18:0_16:0	0.043±0.276	0.182±3.757	0.151±1.898	0.114±1.539	0.118±2.763		<0.01**	0.690476	0.309524	0.420635
GP	PE-O	PE O-18:0_18:1	0.113±0.918	1.437±20.956	1.157±18.77	0.7±17.624	0.419±9.171		<0.01**	0.309524	<0.05*	<0.05*
GP	PE-O	PE O-18:0_20:1	0.052±0.511	0.459±7.854	0.419±5.052	0.341±4.821	0.311±7.718		<0.01**	0.84127	0.420635	0.420635
GP	PE-O	PE O-18:1_18:1	1.06±7.293	12.128±174.658	13.837±131.184	11.341±90.709	9.011±210.206		<0.01**	0.547619	0.420635	0.547619
GP	PE-O	PE O-18:1_20:2	0.475±3.136	3.045±46.442	3.012±23.603	2.688±14.555	2.588±61.417		<0.01**	0.690476	0.690476	0.547619
GP	PE-O	PE O-18:1_20:3	0.551±3.296	0.803±10.061	1.113±5.613	1.217±4.05	1.334±35.843		0.150794	<0.05*	<0.01**	<0.01**
GP	PE-O	PE O-18:1_20:4	1.287±7.085	2.004±22.341	2.479±9.478	2.587±4.845	2.978±51.739		0.0952381	0.0952381	<0.01**	<0.01**
GP	PE-O	PE O-18:1_22:4	0.986±7.09	2.573±30.77	3.011±20.274	2.878±16.178	2.503±58.455		<0.01**	0.309524	1	0.547619
GP	PE-O	PE O-18:1_22:5	1.497±8.691	3.921±49.272	4.619±25.984	4.357±41.078	4.606±58.499		<0.01**	0.420635	0.84127	0.84127
GP	PE-O	PE O-18:1_24:2	0.048±0.39	0.218±3.009	0.248±1.971	0.227±1.141	0.223±5.746		<0.01**	0.547619	0.84127	0.547619
GP	PE-O	PE O-18:1_24:3	0.083±0.774	0.29±4.339	0.365±2.371	0.328±2.511	0.303±8.031		<0.01**	0.222222	0.420635	0.547619
GP	PE-O	PE O-18:2_16:1	0.16±0.675	1.752±15.916	1.29±14.599	0.916±14.655	0.436±11.117		<0.01**	0.0952381	<0.05*	<0.01**
GP	PE-O	PE O-18:2_17:1	0.037±0.228	0.619±5.94	0.445±5.477	0.337±1.798	0.153±3.611		<0.01**	0.0555556	<0.01**	<0.01**
GP	PE-O	PE O-18:2_18:1	2.909±17.494	37.879±976.166	27.828±471.766	19.596±383.987	11.177±180.416		<0.01**	0.420635	0.222222	0.150794
GP	PE-O	PE O-18:2_19:1	0.071±0.584	0.775±19.37	0.687±14.892	0.341±2.124	0.341±5.744		<0.01**	0.84127	0.150794	0.0952381
GP	PE-O	PE O-18:2_20:4	1.28±6.825	2.936±36.877	2.571±26.507	2.862±20.232	2.687±40.22		<0.01**	0.309524	0.420635	0.547619
GP	PE-O	PE O-18:2_22:1	0.132±0.826	0.192±2.521	0.243±1.931	0.269±1.934	0.429±13.204		0.150794	0.150794	<0.05*	<0.01**
GP	PE-O	PE O-18:2_22:2	0.243±1.76	1.999±31.058	1.254±9.093	1.142±11.01	0.915±23.914		<0.01**	0.0555556	<0.05*	<0.05*
GP	PE-O	PE O-18:2_22:5	1.789±5.545	2.468±29.972	3.45±16.925	3.532±7.077	3.972±63.974		0.150794	<0.05*	<0.01**	<0.01**
GP	PE-O	PE O-18:2_22:6	3.719±20.036	6.724±72.92	9.186±94.231	10.872±86.7	23.367±498.654		<0.05*	0.0952381	<0.01**	<0.01**
GP	PE-O	PE O-18:2_24:3	0.193±1.696	0.548±7.917	0.696±3.392	0.644±6.267	0.557±12.261		<0.01**	0.0952381	0.690476	0.547619
GP	PE-O	PE O-18:2_24:4	0.032±0.518	0.032±0.764	0.033±0.991	0.051±1.172	0.085±3.087		1	0.690476	0.420635	<0.05*
GP	PE-O	PE O-19:0_22:5	0.088±0.252	0.075±0.398	0.126±0.569	0.152±0.579	0.158±1.507		<0.05*	<0.01**	<0.01**	<0.01**
GP	LPC	LPC 14:0	0.708±2.635	4.207±23.164	0.324±14.492	0.569±25.432	1.752±28.338		<0.01**	<0.01**	<0.01**	<0.01**
GP	LPC	LPC 15:0	0.097±0.481	5.812±38.459	2.516±30.769	1.609±36.145	0.418±5.488		<0.01**	<0.01**	<0.01**	<0.01**
GP	LPC	LPC 16:0	6.641±15.277	23.848±163.836	17.322±54.69	15.15±165.583	13.356±235.713		<0.01**	<0.01**	<0.05*	<0.05*
GP	LPC	LPC 16:1	0.046±0.673	1.989±7.387	1.744±16.729	1.468±8.333	0.322±3.68		<0.01**	0.309524	<0.05*	<0.01**
GP	LPC	LPC 17:0	0.298±0.713	7.034±44.63	3.502±30.544	2.622±42.512	1.024±15.183		<0.01**	<0.01**	<0.01**	<0.01**
GP	LPC	LPC 17:1	0.253±1.369	5.654±45.802	0.736±32.912	1.034±46.239	0.776±11.132		<0.01**	<0.01**	<0.01**	<0.01**
GP	LPC	LPC 18:0	12.218±33.741	19.82±120.203	17.133±19.617	17.072±18.253	19.563±245.503		<0.01**	0.150794	0.150794	0.547619
GP	LPC	LPC 18:1	15.762±47.373	25.308±332.681	1.298±58.043	0.289±12.941	28.114±490.728		<0.01**	<0.01**	<0.01**	<0.01**
GP	LPC	LPC 18:2	0.203±1.968	0.038±0.261	0.055±0.492	0.082±1.184	0.181±2.324		<0.01**	<0.05*	<0.01**	<0.01**
GP	LPC	LPC 19:1	0.086±0.751	1.038±10.277	0.059±2.645	0.095±4.238	0.476±7.887		<0.01**	0.0555556	0.0952381	<0.01**
GP	LPC	LPC 20:0	0.438±2.674	1.899±13.414	0.091±4.05	0.112±5.03	2.09±37.825		0.0952381	0.0952381	<0.05*	<0.01**
GP	LPC	LPC 20:1	0.503±1.895	2.291±24.845	0.22±9.834	0.034±1.528	2.773±53.119		0.547619	0.0952381	<0.01**	<0.01**
GP	LPC	LPC 20:3	0.174±2.928	0.113±3.551	0.028±1.249	0.034±1.505	0.264±5.616		<0.01**	0.690476	0.309524	<0.05*
GP	LPC	LPC 20:4	0.19±2.212	0.043±0.332	0.058±0.637	0.078±1.087	0.199±2.617		<0.01**	0.0952381	<0.01**	<0.01**
GP	LPC	LPC 22:0	0.484±3.669	0.775±4.662	0.164±7.35	0.096±4.303	1.566±32.377		<0.01**	<0.01**	<0.01**	<0.01**
GP	LPC	LPC 22:4	0.008±0.026	0.037±1.621	0.008±0.379	0.017±0.739	0.146±3.308		<0.01**	0.0555556	<0.01**	<0.01**
GP	LPC	LPC 22:6	0.172±1.899	0.21±2.156	0.028±1.26	0.037±1.641	0.64±6.58		<0.01**	<0.01**	<0.01**	<0.05*
GP	LPC-O	LPC O-15:0	0.009±0.153	0.447±2.036	0.162±1.899	0.11±2.303	0.05±0.787		<0.01**	<0.01**	<0.01**	<0.01**
GP	LPC-O	LPC O-16:0	0.416±2.92	2.095±11.058	1.299±6.021	1.098±7.966	1.056±12.336		<0.01**	<0.01**	<0.01**	<0.01**
GP	LPC-O	LPC O-16:1	0.178±0.68	0.719±3.413	0.59±1.477	0.565±2.185	0.529±6.895		<0.01**	<0.05*	<0.05*	0.0952381
GP	LPC-O	LPC O-18:0	0.209±1.25	0.71±4.242	0.628±1.766	0.58±1.57	0.671±12.9		<0.01**	0.309524	<0.05*	0.222222
GP	LPC-O	LPC O-18:1	0.019±0.054	0.158±1.009	0.125±0.389	0.119±0.533	0.115±1.666		<0.01**	0.0555556	<0.05*	0.0952381
GP	LPC-O	LPC O-18:2	0.289±1.467	1.197±8.161	1.009±3.849	1.031±5.33	0.866±8.723		<0.01**	0.150794	0.150794	<0.05*
GP	LPE	LPE 15:0	0.127±0.324	3.072±19.534	1.64±22.904	1.019±30.709	0.128±0.721		<0.01**	<0.01**	<0.01**	<0.01**
GP	LPE	LPE 16:0	0.035±0.246	0.863±7.467	0.596±10.44	0.383±2.289	0.17±2.523		<0.01**	0.150794	<0.01**	<0.01**
GP	LPE	LPE 16:1	0.016±0.281	7.289±27.372	5.76±70.876	4.152±83.777	0.289±3.177		<0.01**	<0.05*	<0.05*	<0.01**
GP	LPE	LPE 17:0	0.058±0.491	18.661±182.786	10.248±130.696	6.566±182.849	0.741±11.868		<0.01**	<0.01**	<0.01**	<0.01**
GP	LPE	LPE 17:1	0.01±0.024	2.851±22.65	1.837±25.719	1.166±29.496	0.054±0.543		<0.01**	<0.05*	<0.05*	<0.01**
GP	LPE	LPE 18:0	5.434±30.576	27.935±199.121	23.675±211.809	17.681±221.447	12.669±258.014		<0.01**	0.309524	<0.05*	<0.05*
GP	LPE	LPE 18:1	0.632±2.419	12.737±82.697	9.806±100.844	7.095±125.149	2.067±45.539		<0.01**	<0.05*	<0.05*	<0.01**
GP	LPE	LPE 18:2	0.054±0.562	0.075±1.202	0.091±1.734	0.09±1.52	0.106±2.162		0.420635	0.84127	0.547619	0.420635
GP	LPE	LPE 19:0	0.002±0.012	0.358±2.961	0.196±2.79	0.111±3.065	0.019±0.401		<0.01**	<0.01**	<0.01**	<0.01**
GP	LPE	LPE 19:1	0.003±0.005	0.206±1.656	0.119±1.631	0.073±1.699	0.013±0.581		<0.01**	<0.01**	<0.01**	<0.01**
GP	LPE	LPE 20:3	0.148±2.434	0.08±1.756	0.181±3.974	0.175±4.065	0.413±12.827		0.0952381	0.0952381	0.0952381	<0.01**
GP	LPE	LPE 20:4	0.355±6.216	0.441±7.581	0.584±12.804	0.532±5.783	1.258±33.225		0.547619	0.309524	0.420635	<0.05*
GP	LPE	LPE 20:5	0.423±6.798	0.194±3.349	0.256±6.179	0.238±3.043	0.63±16.044		<0.05*	0.420635	0.547619	<0.05*
GP	LPE	LPE 22:5	0.095±0.379	0.154±1.275	0.194±4.92	0.115±2.425	0.423±13.443		<0.01**	1	0.150794	0.150794
GP	LPE	LPE 22:6	0.073±0.974	0.261±3.67	0.338±7.139	0.339±3.789	0.632±13.182		<0.01**	0.547619	0.222222	<0.05*
GP	LPE	LPE 34:1	2.901±13.929	6.279±57.98	4.97±41.798	2.982±63.669	2.656±49.772		<0.01**	0.0555556	<0.05*	<0.01**
GP	LPE	LPE 36:0	0.055±0.919	0.061±0.489	0.062±0.359	0.063±0.626	0.26±6.122		0.690476	0.84127	0.690476	<0.01**
GP	LPE	LPE 36:1	1.324±6.029	2.305±29.146	2.622±26.877	2.477±19.869	2.977±58.874		<0.05*	0.690476	0.690476	0.547619
GP	LPE	LPE 40:5	3.228±12.635	1.092±9.73	1.108±7.37	1.12±21.339	2.818±27.925		<0.01**	0.84127	0.547619	<0.01**
GP	LPE-O	LPE O-15:1	0.008±0.107	1.748±12.297	0.67±10.439	0.38±11.142	0.053±0.878		<0.01**	<0.01**	<0.01**	<0.01**
GP	LPE-O	LPE O-16:0	0.031±0.156	1.579±11.701	0.897±15.964	0.438±17.404	0.096±2.028		<0.01**	<0.01**	<0.01**	<0.01**
GP	LPE-O	LPE O-16:1	0.656±4.69	12.802±51.598	8.188±86.172	5.846±90.416	2.843±47.138		<0.01**	<0.01**	<0.01**	<0.01**
GP	LPE-O	LPE O-17:0	0.003±0.007	0.288±3.769	0.145±2.776	0.059±3.355	0.006±0.035		<0.01**	<0.01**	<0.01**	<0.01**
GP	LPE-O	LPE O-17:1	0.034±0.191	1.39±10.925	0.825±9.61	0.547±10.055	0.198±3.16		<0.01**	<0.01**	<0.01**	<0.01**
GP	LPE-O	LPE O-18:0	0.042±0.18	0.6±5.116	0.517±8.35	0.273±9.399	0.135±3.143		<0.01**	0.84127	0.0952381	<0.01**
GP	LPE-O	LPE O-18:2	0.684±4.238	3.847±21.991	3.45±21.322	2.878±23.293	2.141±30.313		<0.01**	0.309524	<0.05*	<0.05*
GP	PA	PA 15:0_16:1	0.004±0.093	0.554±8.476	0.192±4.364	0.122±5.214	0.01±0.297		<0.01**	<0.05*	<0.05*	<0.01**
GP	PA	PA 16:0_16:1	0.014±0.252	0.612±7.879	0.278±6.179	0.201±5.857	0.05±1.493		<0.01**	<0.05*	<0.05*	<0.01**
GP	PA	PA 16:1_16:1	0.004±0.094	0.708±9.591	0.353±7.94	0.227±8.317	0.014±0.405		<0.01**	<0.05*	<0.05*	<0.01**
GP	PG	PG 14:0_16:1	0.001±0.009	0.83±7.134	0.371±6.677	0.203±6.716	0.009±0.143		<0.01**	<0.01**	<0.01**	<0.01**
GP	PG	PG 15:0_15:0	0.006±0.046	0.521±5.709	0.213±3.862	0.115±5.013	0.029±0.665		<0.01**	<0.01**	<0.01**	<0.01**
GP	PG	PG 15:0_16:0	0.001±0.006	0.589±5.866	0.254±4.647	0.132±5.458	0.015±0.268		<0.01**	<0.01**	<0.01**	<0.01**
GP	PG	PG 15:0_16:1	0.001±0.004	1.716±13.183	0.755±14.193	0.387±15.094	0.009±0.187		<0.01**	<0.01**	<0.01**	<0.01**
GP	PG	PG 15:0_18:1	0.019±0.093	3.425±33.566	1.698±26.844	1.035±30.717	0.153±2.856		<0.01**	<0.05*	<0.01**	<0.01**
GP	PG	PG 16:1_16:1	0.001±0.009	0.127±1.172	0.065±1.074	0.039±1.161	0.001±0.016		<0.01**	<0.05*	<0.01**	<0.01**
GP	PG	PG 16:1_17:1	0.004±0.064	1.224±8.986	0.715±11.745	0.484±12.656	0.063±1.601		<0.01**	<0.05*	<0.05*	<0.01**
GP	PG	PG 16:1_18:1	0.143±1.714	3.365±30.898	2.49±25.34	1.63±34.603	0.667±36.227		<0.01**	0.0952381	<0.05*	<0.01**
GP	PG	PG 16:1_22:6	1.73±9.021	6.978±74.096	10.566±78.264	9.769±57.775	7.508±166.052		<0.01**	0.309524	0.150794	1
GP	PG	PG 17:0_17:1	0.113±0.361	0.569±4.504	0.509±4.11	0.413±3.935	0.379±8.025		<0.01**	0.222222	<0.05*	0.150794
GP	PG	PG 17:1_18:1	0.059±0.233	1.531±16.693	1.431±15.884	0.988±7.289	0.424±10.638		<0.01**	1	0.0555556	<0.01**
GP	PG	PG 18:0_18:2;O	0.597±3.302	0.801±8.065	1.061±7.403	1.059±6.639	1.027±30.16		<0.01**	0.0952381	<0.01**	0.0555556
GP	PG	PG 18:1_20:2	0.424±2.338	0.32±3.165	0.548±3.96	0.52±3.782	0.443±10.039		0.150794	0.0952381	<0.01**	<0.01**
GP	PG	PG 18:1_20:5	0.008±0.153	0.397±30.206	0.077±1.301	0.048±0.401	0.051±1.6		<0.01**	<0.01**	<0.01**	<0.05*
GP	PG	PG 18:2_22:6	0.396±1.774	0.202±6.059	0.496±3.618	0.499±2.592	0.511±14.884		<0.01**	<0.01**	<0.01**	<0.01**
GP	PG	PG 20:2_22:6	0.85±4.304	0.423±3.824	0.969±7.141	1.124±3.275	1.396±31.424		<0.01**	<0.01**	<0.01**	<0.01**
GP	PG	PG 20:5_22:6	2.248±10.924	1.606±16.302	3.432±33.561	4.424±25.067	8.262±183.154		<0.01**	<0.01**	<0.01**	<0.01**
GP	PG	PG 32:1	0.026±0.574	4.504±44.511	2.77±45.584	1.629±50.731	0.206±4.803		<0.01**	0.0555556	<0.05*	<0.01**
GP	PG	PG 34:2	0.23±1.105	5.759±44.055	5.316±62.489	4.271±60.934	1.642±40.833		<0.01**	1	0.222222	<0.01**
GP	PG	PG 34:3	0.002±0.011	0.883±6.409	0.562±10.26	0.346±8.585	0.017±0.411		<0.01**	<0.05*	<0.01**	<0.01**
GP	PG	PG 36:2	0.263±1.149	0.24±2.076	0.296±2.229	0.28±2.395	0.227±6.231		<0.01**	<0.05*	<0.01**	0.547619
GP	PG	PG 38:4	0.316±1.307	0.079±0.7	0.199±2.522	0.206±2.901	0.168±4.202		0.0952381	<0.05*	<0.01**	0.0952381
GP	PG	PG 38:5	0.091±0.588	0.203±1.678	0.218±1.529	0.243±1.446	0.265±6.063		<0.05*	<0.01**	<0.01**	0.309524
GP	PG	PG 40:6	0.187±0.741	0.025±0.284	0.063±0.793	0.081±0.639	0.205±5.513		<0.01**	<0.01**	<0.01**	<0.01**
GP	PG	PG 40:7	0.054±0.281	0.093±1.95	0.209±3.642	0.279±0.889	0.304±7.598		<0.01**	<0.01**	<0.01**	<0.01**
GP	PG	PG 44:11	0.178±0.876	0.027±0.399	0.084±1.62	0.116±1.065	0.246±6.19		<0.01**	<0.01**	<0.01**	<0.01**
GP	PG	PG 44:12	0.102±0.38	0.005±0.017	0.011±0.252	0.013±0.192	0.037±0.878		<0.01**	<0.01**	<0.01**	<0.01**
GP	PI	PI 16:0_16:1	0.054±0.906	6.267±40.763	4.02±64.259	2.508±53.937	0.371±6.501		<0.01**	<0.05*	<0.01**	<0.01**
GP	PI	PI 16:1_16:1	0.003±0.061	3.058±16.97	2.516±42.42	1.633±31.175	0.072±2.084		<0.01**	0.309524	<0.05*	<0.01**
GP	PI	PI 16:1_17:1	0.001±0.005	4.501±31.152	2.817±53.488	1.617±42.485	0.003±0.051		<0.01**	<0.05*	<0.01**	<0.01**
GP	PI	PI 16:1_18:1	0.141±0.659	13.399±97.991	9.135±135.899	6.168±109.193	1.039±22.269		<0.01**	0.0555556	<0.05*	<0.01**
GP	PI	PI 17:0_16:1	0.005±0.127	3.648±25.964	1.953±31.588	1.145±26.709	0.193±5.048		<0.01**	<0.05*	<0.01**	<0.01**
GP	PI	PI 17:0_20:3	0.122±1.098	0.915±6.096	0.693±5.224	0.726±12.271	0.416±10.075		<0.01**	0.0555556	0.222222	<0.05*
GP	PI	PI 17:0_20:5	0.051±0.33	1.149±10.47	0.678±8.02	0.544±9.699	0.139±2.698		<0.01**	<0.05*	<0.01**	<0.01**
GP	PI	PI 17:1_18:1	0.337±3.871	4.512±36.593	3.113±37.217	2.077±49.031	0.835±17.397		<0.01**	0.0555556	<0.05*	<0.01**
GP	PI	PI 18:1_18:1	0.501±2.14	3.564±24.738	3.185±35.06	3.052±21.737	2.819±66.253		<0.01**	0.420635	0.309524	0.150794
GP	PI	PI 34:1	0.33±2.049	3.228±28.891	2.424±34.19	2.075±9.82	1.982±41.07		<0.01**	0.0555556	<0.01**	0.0555556
GP	PI	PI 36:3	0.317±1.713	1.339±10.61	1.207±12.289	1.156±13.664	0.739±17.545		<0.01**	0.420635	0.420635	0.0555556
GP	PI	PI 36:4	0.616±2.859	5.206±44.582	4.464±42.443	3.621±38.341	2.179±48.645		<0.01**	0.309524	<0.05*	<0.05*
GP	PI	PI 36:5	0.306±1.797	1.66±10.672	1.484±16.351	1.292±19.58	0.464±10.494		<0.01**	0.309524	0.222222	<0.01**
GP	PI	PI 37:4	0.122±0.875	3.868±39.104	2.335±26.13	1.949±31.499	0.614±12.144		<0.01**	<0.05*	<0.05*	<0.01**
GP	PI	PI 38:3	2.213±10.165	1.337±11.618	1.785±17.607	2.21±26.456	3.548±74.447		<0.01**	0.150794	<0.01**	<0.01**
GP	PI	PI 38:4	6.258±28.759	3.638±25.348	4.373±55.271	5.152±34.532	12.204±264.666		<0.01**	0.420635	<0.05*	<0.01**
GP	PI	PI 38:5	3.276±17.416	2.023±21.766	2.47±18.423	2.493±22.817	3.814±85.702		<0.01**	0.309524	0.420635	<0.01**
GP	PI	PI 38:6	0.551±3.304	1.595±12.27	1.505±15.856	1.242±13.973	0.536±14.095		<0.01**	0.547619	0.0555556	<0.01**
GP	PI	PI 40:5	0.278±1.143	0.146±6.458	0.256±6.218	0.313±5.533	0.86±16.006		0.150794	0.222222	0.0952381	<0.01**
GP	PI	PI 40:6	0.067±0.266	0.337±2.809	0.33±1.986	0.303±1.2	0.572±11.63		<0.01**	0.547619	0.150794	<0.01**
GP	PI	PI 40:7	0.03±0.223	0.459±3.307	0.415±4.485	0.314±3.439	0.179±5.216		<0.01**	0.420635	<0.05*	<0.05*
GP	PS	PS 16:0_17:1	0.003±0.052	0.248±2.82	0.126±2.131	0.088±2.154	0.006±0.117		<0.01**	<0.05*	<0.05*	<0.01**
GP	PS	PS 16:1_18:1	0.125±2.62	0.982±7.215	0.712±10.094	0.969±50.218	0.234±6.444		<0.01**	0.0952381	0.150794	<0.01**
GP	PS	PS 17:0_17:1	0.437±1.235	0.951±11.546	0.679±13.767	0.512±12.768	0.361±11.924		<0.01**	0.0952381	<0.05*	<0.05*
GP	PS	PS 18:0_18:1	0.199±3.512	0.109±1.996	0.203±2.744	0.229±3.293	0.524±7.802		0.0555556	<0.05*	<0.05*	<0.01**
GP	PS	PS 18:0_18:2	1.282±8.908	0.824±11.517	0.915±7.792	0.916±10.372	2.268±45.855		<0.05*	0.690476	0.690476	<0.05*
GP	PS	PS 18:0_20:5	0.926±6.099	0.329±3.154	0.179±2.913	0.161±2.063	0.326±5.247		<0.01**	<0.01**	<0.01**	0.84127
GP	PS	PS 18:1_20:5	0.005±0.029	0.073±0.961	0.049±1.213	0.018±0.711	0.007±0.056		<0.01**	0.222222	<0.01**	<0.01**
GP	PS	PS 19:1_19:2	0.077±0.806	0.015±0.329	0.022±0.362	0.025±0.497	0.083±1.165		<0.01**	0.222222	0.150794	<0.01**
GP	PS	PS 20:2_20:3	0.137±0.981	0.037±0.879	0.071±0.806	0.074±0.754	0.177±4.256		<0.01**	<0.05*	<0.01**	<0.01**
GP	PS	PS 38:4	1.035±6.551	0.34±3.704	0.865±23.112	0.479±9.551	0.799±16.736		<0.01**	0.222222	0.309524	<0.01**
GP	PS	PS 40:6	0.324±3.567	2.015±54.928	1.664±27.581	1.379±35.716	1.741±21.172		<0.01**	0.84127	0.420635	0.690476
SL	SM	SM 32:1;3O	0.026±0.208	0.144±1.127	0.148±1.481	0.109±1.422	0.084±1.825		<0.01**	0.547619	0.150794	0.0952381
SL	SM	SM 34:0;3O	0.072±1.003	0.272±2.032	0.319±1.777	0.296±2.442	0.318±2.089		<0.01**	0.222222	1	0.150794
SL	SM	SM 34:1;3O	1.537±9.626	4.288±31.196	5.593±35.857	5.123±41.398	4.566±77.882		<0.01**	<0.05*	0.309524	0.690476
SL	SM	SM 34:2;3O	0.165±0.697	1.724±14.126	1.788±15.276	1.406±16.589	1.144±26.644		<0.01**	0.420635	0.309524	0.150794
SL	SM	SM 36:2;3O	0.083±0.564	0.126±1.235	0.211±1.186	0.196±1.695	0.188±3.924		<0.05*	<0.01**	<0.01**	0.0952381
SL	SM	SM 8:0;2O/24:0	0.704±5.868	0.422±3.329	0.382±2.302	0.385±2.114	0.657±16.388		<0.01**	0.420635	0.420635	0.0952381
SL	SM	SM 8:0;2O/26:0	0.124±2.587	2.044±13.865	1.017±15.211	0.787±10.452	0.437±10.895		<0.01**	<0.01**	<0.01**	<0.01**
SL	SM	SM 8:0;2O/32:0	0.063±0.547	0.513±6.762	0.383±4.762	0.299±3.481	0.293±6.034		<0.01**	0.0952381	0.0555556	<0.05*
SL	SM	SM 8:0;2O/34:0	0.027±0.203	0.418±5.299	0.272±3.253	0.194±2.052	0.191±4.181		<0.01**	0.0952381	<0.05*	<0.05*
SL	SM	SM 8:1;2O/24:0	0.924±3.653	1.71±10.477	1.169±10.265	1.145±4.211	1.252±18.363		<0.01**	<0.01**	<0.01**	0.0952381
SL	SM	SM 8:1;2O/24:1	0.071±1.351	0.958±5.567	0.648±6.311	0.485±6.656	0.431±13.929		<0.01**	<0.05*	<0.01**	<0.05*
SL	SM	SM 8:1;2O/25:0	0.953±3.689	5.594±40.597	4.346±34.993	3.776±40.501	2.34±29.531		<0.01**	0.0555556	<0.05*	<0.01**
SL	SM	SM 8:1;2O/26:0	123.726±558.457	164.359±972.784	188.857±900.961	182.451±334.324	227.703±3392.312		<0.05*	0.0952381	0.0952381	<0.05*
SL	SM	SM 8:1;2O/26:1	1.672±7.132	5.852±40.549	5.463±31.494	5.407±22.555	5.43±82.232		<0.01**	0.84127	0.420635	0.309524
SL	SM	SM 8:1;2O/27:0	3.432±24.895	16.004±146.571	15.502±94.24	12.529±130.196	8.973±163.938		<0.01**	0.547619	0.420635	<0.05*
SL	SM	SM 8:1;2O/28:1	0.776±2.229	1.074±6.71	1.216±4.938	1.009±8.442	0.706±12.735		<0.05*	0.0952381	0.547619	0.150794
SL	SM	SM 8:1;2O/29:0	0.871±6.11	7.785±82.755	6.698±59.191	4.614±74.653	2.31±56.315		<0.01**	0.150794	<0.05*	<0.01**
SL	SM	SM 8:1;2O/30:0	0.926±7.274	5.053±49.823	3.955±44.4	3.263±41.428	1.856±26.487		<0.01**	0.150794	<0.05*	<0.01**
SL	SM	SM 8:1;2O/30:1	0.254±0.981	0.918±6.583	0.832±5.67	0.676±5.584	0.436±6.619		<0.01**	0.309524	<0.05*	<0.05*
SL	SM	SM 8:1;2O/31:0	0.094±0.687	1.953±26.821	1.279±16.846	0.864±18.563	0.308±6.166		<0.01**	0.0952381	<0.05*	<0.01**
SL	SM	SM 8:1;2O/32:0	2.069±16.548	11.472±132.617	10.068±95.05	8.288±75.538	6.336±109.29		<0.01**	0.150794	0.150794	<0.05*
SL	SM	SM 8:1;2O/32:1	0.917±4.991	4.148±44.017	3.16±30.146	2.725±27.255	1.893±28.273		<0.01**	0.0555556	<0.05*	<0.05*
SL	SM	SM 8:1;2O/32:5	1.237±16.029	0.415±4.546	0.454±7.663	0.588±7.325	0.995±18.249		<0.01**	1	0.0555556	<0.01**
SL	SM	SM 8:1;2O/33:0	0.306±2.228	4.765±64.095	3.277±43.533	2.329±42.753	1.13±23.661		<0.01**	0.0952381	<0.05*	<0.01**
SL	SM	SM 8:1;2O/34:0	1.402±11.754	12.863±171.483	10.753±115.712	8.64±95.122	6.508±145.698		<0.01**	0.150794	0.150794	<0.05*
SL	SM	SM 8:1;2O/34:1	5.834±39.436	26.987±305.542	25.351±208.69	22.634±152.225	18.287±179.179		<0.01**	0.547619	0.222222	0.150794
SL	SM	SM 8:1;2O/34:2	1.632±7.469	4.545±50.96	4.103±28.258	3.935±16.332	3.671±49.22		<0.01**	0.690476	0.222222	0.420635
SL	SM	SM 8:1;2O/34:3	1.408±7.265	0.983±8.209	1.099±7.773	1.131±5.453	1.656±42.813		<0.01**	0.690476	0.0952381	<0.05*
SL	SM	SM 8:1;2O/35:0	0.027±0.101	0.497±6.725	0.33±4.34	0.221±4.18	0.126±2.964		<0.01**	0.0952381	<0.05*	<0.01**
SL	SM	SM 8:1;2O/36:1	0.383±3.203	1.072±14.401	0.955±12.351	0.937±4.337	1.537±46.032		<0.01**	0.547619	0.309524	0.84127
SL	SM	SM 9:1;2O/24:1	0.046±0.491	2.358±19.905	1.244±17.524	0.816±14.507	0.263±5.244		<0.01**	<0.05*	<0.01**	<0.01**
SL	SM	SM 9:1;2O/26:1	0.558±4.234	3.629±31.481	3.4±16.301	2.926±22.575	2.212±58.572		<0.01**	0.420635	0.222222	0.150794
SL	SM	SM 9:1;2O/30:1	0.173±1.283	2.545±59.549	1.413±14.033	0.999±15.771	0.476±12.191		<0.01**	0.0555556	<0.05*	<0.01**
SL	SM	SM 9:1;2O/32:1	0.417±2.507	5.167±64.12	3.601±39.393	2.742±37.964	1.598±28.053		<0.01**	0.0952381	<0.05*	<0.01**
SL	SM	SM 9:1;2O/34:1	0.123±1.178	0.824±11.536	0.622±7.374	0.462±6.57	0.339±7.462		<0.01**	0.150794	0.0555556	<0.05*
SL	SM	SM 9:1;2O/34:3	0.145±1.156	0.416±4.944	0.434±3.929	0.375±4.37	0.539±15.289		<0.01**	0.84127	0.690476	1
SL	SM	Sphingosine (C17 base)	2.734±5.669	6.083±31.513	5.758±15.771	4.975±25.124	4.64±79.032		<0.01**	0.309524	<0.05*	0.150794
SL	CER	Cer 18:1;2O/16:0	0.079±0.47	0.583±5.678	0.497±4.375	0.4±5.146	0.294±6.122		<0.01**	0.150794	<0.05*	<0.05*
SL	CER	Cer 18:1;2O/17:0	0.07±0.597	1.329±21.766	1.005±11.307	0.82±13.849	0.28±6.047		<0.01**	0.150794	0.0555556	<0.01**
SL	CER	Cer 18:1;2O/18:0	0.55±4.109	2.939±45.83	2.264±24.318	1.817±25.115	0.835±15.68		<0.01**	0.0952381	0.0952381	<0.01**
SL	CER	Cer 18:1;2O/19:0	0.016±0.129	0.731±11.901	0.577±6.958	0.408±8.31	0.06±1.657		<0.01**	0.0952381	<0.05*	<0.01**
SL	CER	Cer 18:1;2O/21:0	0.02±0.14	1.027±15.91	0.798±10.089	0.599±10.832	0.103±2.04		<0.01**	0.0952381	<0.05*	<0.01**
SL	CER	Cer 18:1;2O/22:0	0.413±3.131	5.435±81.572	4.246±42.34	3.393±45.002	1.631±33.729		<0.01**	0.150794	0.150794	<0.05*
SL	CER	Cer 18:1;2O/24:0	0.658±4.406	9.457±147.675	7.65±74.283	6.131±72.932	3.776±83.074		<0.01**	0.222222	0.222222	<0.05*
SL	CER	Cer 18:1;2O/25:0	0.014±0.163	0.473±8.702	0.336±4.814	0.229±4.336	0.106±2.101		<0.01**	0.222222	<0.05*	<0.01**
SL	CER	Cer 18:1;2O_36:10	0.654±4.607	2.922±39.782	2.492±22.442	1.992±22.249	1.308±36.742		<0.01**	0.547619	0.0952381	<0.05*
SL	CER	Cer 18:2;2O/16:0	0.312±3.531	1.509±12.884	1.354±16.681	1.508±11.755	0.849±2.58		<0.01**	0.547619	0.84127	<0.01**
SL	CER	Cer 18:2;2O/20:0	0.058±0.226	0.887±12.054	0.715±8.659	0.558±7.935	0.138±2.848		<0.01**	0.222222	<0.05*	<0.01**
SL	CER	Cer 18:2;2O/24:0	1.378±10.935	13.967±195.258	11.437±99.774	10.279±83.933	6.466±121.897		<0.01**	0.150794	0.150794	<0.05*
SL	CER	Cer 18:2;2O/24:1	0.573±3.871	5.018±61.363	4.162±32.181	4.012±29.22	2.559±43.318		<0.01**	0.150794	0.150794	<0.05*
SL	CER	Cer 18:2;2O_22:0	0.391±3.496	2.739±30.192	2.862±15.004	2.635±8.172	1.326±24.232		<0.01**	1	0.309524	<0.05*
SL	CER	Cer 20:0;2O/16:2	0.1±0.62	0.506±6.584	0.523±3.305	0.452±3.898	0.215±4.975		<0.01**	1	0.547619	<0.05*
SL	CER	Cer 25:0;2O/16:3	0.01±0.061	0.355±4.72	0.228±2.141	0.2±2.387	0.057±0.879		<0.01**	0.0952381	<0.05*	<0.01**
SL	CER	Cer 27:0;2O/16:2	0.031±0.234	0.726±11.461	0.487±5.824	0.372±4.621	0.147±2.888		<0.01**	0.0952381	<0.05*	<0.01**
SL	CER	Cer 34:0;2O/6:0	0.019±0.151	0.309±5.444	0.196±1.595	0.166±2.67	0.096±2.007		<0.01**	0.150794	0.0555556	<0.05*
SL	CER	Cer 35:0;2O/7:0	0.02±0.193	0.421±5.985	0.218±2.076	0.192±3.462	0.12±2.257		<0.01**	0.0555556	<0.05*	<0.05*
SL	CER	Cer(d18:1_23:0)	0.193±0.466	2.952±45.721	2.591±9.831	2.103±14.855	1.112±29.059		<0.01**	0.309524	0.150794	<0.05*
SL	CER	Cer(d18:2_23:0)	0.145±2.706	2.716±37.756	2.321±12.789	1.747±35.956	0.73±10.512		<0.01**	0.150794	0.150794	<0.01**
SL	CER	Ceramide (18:1_16:0)	2.096±13.432	4.486±42.963	4.563±19	4.196±17.46	3.44±47.335		<0.01**	0.84127	0.420635	0.309524
SL	CER	Ceramide (d18:1/20:0)	0.271±1.644	1.78±22.884	1.868±11.899	1.558±8.288	0.712±16.726		<0.01**	1	0.309524	<0.05*
SL	CER	D-sphingosine	0.575±2.112	1.216±9.138	1.44±8.505	1.25±6.981	1.317±32.543		<0.01**	0.150794	0.690476	0.309524
SL	HexCER	Hex2Cer 18:1;2O/24:0	0.444±3.443	0.4±4.793	0.447±6.073	0.497±3.885	1.574±48.038		0.690476	0.690476	0.222222	<0.01**
SL	HexCER	Hex2Cer 18:1;2O/24:1	0.728±5.233	0.428±5.057	0.475±8.38	0.573±5.264	1.76±46.977		<0.01**	1	0.150794	<0.01**
SL	HexCER	Hex2Cer 34:1;2O	0.175±1.154	0.061±1.049	0.061±0.925	0.083±0.68	0.203±2.229		<0.01**	1	0.150794	<0.01**
SL	HexCER	Hex2Cer 40:1;2O	0.067±0.425	0.154±1.989	0.114±1.111	0.097±1.118	0.142±2.482		<0.05*	0.0952381	0.0952381	0.547619
SL	HexCER	HexCer 16:1;2O/20:5	0.073±0.389	5.708±72.785	4.581±28.92	3.536±36.58	0.925±21.933		<0.01**	0.150794	0.0952381	<0.01**
SL	HexCER	HexCer 18:1;2O/16:0	3.323±18.463	2.006±17.618	2.198±11.591	2.03±7.556	2.094±33.251		<0.01**	0.547619	0.690476	0.547619
SL	HexCER	HexCer 18:1;2O/20:0	0.508±4.064	2.376±28.534	1.93±23.695	1.319±27.107	0.507±10.395		<0.01**	0.0952381	<0.05*	<0.01**
SL	HexCER	HexCer 18:1;2O/22:0	1.676±14.516	5.658±72.755	4.955±52.986	3.752±51.035	2.479±56.201		<0.01**	0.222222	0.150794	<0.05*
SL	HexCER	HexCer 18:1;2O/23:0	0.23±1.737	2.737±41.077	1.849±26.359	1.259±29.623	0.398±9.508		<0.01**	0.0952381	<0.05*	<0.01**
SL	HexCER	HexCer 18:1;2O/24:0	1.4±9.617	7.145±100.358	5.998±68.106	4.603±63.517	3.237±77.092		<0.01**	0.222222	0.150794	<0.05*
SL	HexCER	HexCer 18:1;2O/24:1	2.245±16.562	17.517±548.53	12.953±512.867	4.111±32.539	5.981±246.163		<0.01**	0.309524	<0.01**	0.0952381
SL	HexCER	HexCer 18:2;2O/22:0	0.24±1.408	0.985±11.864	0.723±8.098	0.546±8.897	0.254±4.88		<0.01**	0.0952381	<0.05*	<0.01**
SL	HexCER	HexCer 22:0;2O/12:1;O	0.223±1.575	0.628±5.714	0.57±4.6	0.468±5.641	0.339±5.992		<0.01**	0.420635	0.0952381	<0.05*
SL	HexCER	HexCer 22:2;2O/16:4	0.001±0.007	0.027±1.735	0.01±0.219	0.008±0.295	0.003±0.033		<0.01**	0.420635	0.0952381	<0.01**
SL	HexCER	HexCer 24:0;2O/20:5	0.005±0.073	0.114±1.709	0.092±1.641	0.072±0.624	0.034±0.331		<0.01**	0.420635	0.150794	<0.01**
SL	HexCER	HexCer 28:1;2O/11:0	0.042±0.296	0.877±13.312	0.591±9.404	0.358±9.982	0.058±1.1		<0.01**	0.0952381	<0.05*	<0.01**
SL	HexCER	HexCer 29:2;2O/12:0	0.099±0.635	0.777±16.938	0.678±9.132	0.316±4.079	0.146±3.625		<0.01**	0.84127	0.0555556	<0.05*
SL	HexCER	HexCer 31:1;2O/12:0	0.032±0.379	0.468±7.101	0.319±4.625	0.202±4.601	0.093±2.019		<0.01**	0.0952381	<0.05*	<0.01**
Data depict the mean ± standard error of the mean (SEM) results for each group. p-values are determined by Wilcoxon Ranksum test. (*p < 0.05, **p < 0.01)

## Sheet: Table S3
Table S3. Correlation between fatty acyl carbon chain length, double bonds and fold changes in each lipid class using Spearman's correlation coefficient
Subclass	Total carbon chain length and log2 (Fold change)		Total double bond and log2 (Fold change)
	GM vs. DM	DM vs.WHS 200	GM vs. DM	DM vs.WHS 200
	R (p-value)	R (p-value)	R (p-value)	R (p-value)
TG	-0.3994 (4.1e-07)	0.4130 (1.5e-07)	-0.4530 (5.2e-09)	0.3432 (1.6e-05)
TG-O	-0.3479 (0.0954)	0.6693(0.0003)	-0.7316(4.9e-05)	0.6594 (0.0005)
DG	-0.7925 (0.0004)	0.8235 (0.0002)	-0.6159 (0.0111)	0.4784 (0.0609)
PC	-0.4369 (0.0002)	0.6439 (3.2e-09)	-0.3892 (0.0010)	0.2725 (0.0246)
PE	-0.5408 (4.2e-0.5)	0.5966 (3.8e-06)	-0.1573 (0.2705)	0.1576 (0.2695)
LPC	-0.2524 (0.2453)	0.3870 (0.0752)	-0.3129 (0.1562)	0.5039 (0.0168)
LPE	-0.7234 (0.0005)	0.7093 (0.0007)	-0.5787 (0.0094)	0.5461 (0.0156)
SM	0.1005 (0.5428)	-0.0665 (0.6875)	-0.2221 (0.1742)	0.1988 (0.225)
CER	0.4008 (0.0522)	-0.2492 (0.2403)	-0.1796 (0.401)	0.1169 (0.5864)
